# Macrophage network dynamics depend on haptokinesis for optimal local surveillance

Neil Paterson<sup>1,2,3</sup>, Tim Lämmermann<sup>1,\*</sup>

## Affiliations:

- 1 Max Planck Institute of Immunobiology and Epigenetics, Freiburg, 79108, Germany.
- 2 International Max Planck Research School for Immunobiology, Epigenetics and Metabolism (IMPRS-IEM), Freiburg, 79108, Germany.
- 3 Faculty of Biology, University of Freiburg, Freiburg, 79104, Germany.

\* Corresponding author: [laemmermann@ie-freiburg.mpg.de](mailto:laemmermann@ie-freiburg.mpg.de)

## Address:

Max Planck Institute of Immunobiology and Epigenetics  
Stübeweg 51  
79108 Freiburg  
Germany  
Phone: +49-761-5108-717

## Key words:

macrophage, haptokinesis, leukocytes, cell networks, migration, integrins, cytoskeleton, tissue surveillance, tissue homeostasis, efferocytosis, sampling, mesenchymal movement, amoeboid cell shape

## Summary

Macrophages are key immune cells with important roles for tissue surveillance in almost all mammalian organs. Cellular networks made up of many individual macrophages allow for optimal removal of dead cell material and pathogens in tissues. However, the critical determinants that underlie these population responses have not been systematically studied. Here, we investigated how cell shape and the motility of individual cells influences macrophage network responses in 3D culture settings and in mouse tissues. We show that surveying macrophage populations can tolerate lowered actomyosin contractility, but cannot easily compensate for a lack of integrin-mediated adhesion. Although integrins were dispensable for macrophage chemotactic responses, they were crucial to control cell movement and protrusiveness for optimal surveillance by a macrophage population. Our study reveals that  $\beta 1$  integrins are important for maintaining macrophage shape and network sampling efficiency in mammalian tissues, and sets macrophage motility strategies apart from the integrin-independent 3D migration modes of many other immune cell subsets.

## Introduction

Macrophages are multifunctional immune cells that populate practically all tissues in the body where they play important roles in tissue homeostasis, organ development, inflammation, metabolic adaptation, tumor development and host defense against pathogens (Okabe & Medzhitov, 2016; Wood & Martin, 2017). As professional phagocytic cells, one of the major homeostatic functions of macrophages, in both invertebrates and vertebrates, is the removal of dead cell corpses and tissue debris (efferocytosis) (Cox et al., 2021; Wood & Martin, 2017). While the phases of corpse recognition (find-me), uptake (eat-me) and digestion (digest-me) are molecularly well described in the context of individually responding cells (Davidson & Wood, 2020b; Elliott & Ravichandran, 2016; Rothlin et al., 2021), much less is known about the role of group dynamics in this process. It is well established that macrophages distribute in numerous mammalian tissues to form large networks of many individual cells (Dawson et al., 2020; Freitas-Lopes et al., 2017; Gordon et al., 2014; Honda et al., 2020; Jain & Weninger, 2013; Nicolas-Avila et al., 2020; Stolp et al., 2020; Uderhardt et al., 2019). However, the population aspect of macrophage efferocytosis in tissues has so far only received little attention and the single cell parameters that critically determine the efferocytic capacity of a whole macrophage population are only poorly understood. In particular, it remains unclear how the cytoskeletal control of single-cell shape and movement influences the efferocytic capacity of mammalian macrophage networks.

Cell shape and cell motility are determined by the balanced interplay of three components: actin polymerization, actomyosin contraction and adhesion to the extracellular environment (Bodor et al., 2020). Leukocyte migration in three-dimensional (3D) interstitial spaces is considered flexible and adaptive, with many immune cells switching to alternate migration modes upon perturbations of any of these three components (Lämmermann & Sixt, 2009). Our current view on interstitial leukocyte motility is still largely influenced by studies with fast-migrating immune cells (dendritic cells, neutrophils, lymphocytes) that traffic between parenchyma and vasculature of mouse tissues (Lämmermann & Germain, 2014). Previous work on these cell types has highlighted that leukocyte motility outside the vasculature relies almost exclusively on cell shape changes driven by the actomyosin cytoskeleton (Lämmermann et al., 2013; Lämmermann et al., 2008; Woolf et al., 2007). This migration mode, commonly referred to as amoeboid migration, is independent from integrin adhesion receptors and strong adhesive interactions with the tissue environment (Paluch et al., 2016; Reversat et al., 2020). Macrophages, as archetypes of tissue-resident immune cells, appear to contrast most other leukocytes. Macrophages in zebrafish larvae (Barros-Becker et al., 2017) and human monocyte-derived macrophages invading into 3D matrigels (Van Goethem

et al., 2011; Van Goethem et al., 2010) move with elongated morphology at lower speeds and show adhesion structures containing heterodimeric integrin receptors (Hynes, 2002). This mode of locomotion is best described as a mesenchymal-like migration and rather resembles the movement patterns of fibroblasts and other non-immune cell types (Yamada & Sixt, 2019). Macrophages in mice also protrude elongated processes for tissue surveillance in almost all organs. Moreover, they are well known as very adhesive cell type with a broad range of different integrin adhesion receptors on their surface (Ley et al., 2016). However, we still have very limited knowledge on the functional contribution of integrins to macrophage shape, positioning and migration in 3D interstitial spaces of murine tissues. Studies of *Drosophila* macrophages, so-called hemocytes, provide currently the best insight into this question. Mutating the main  $\beta$ PS integrin in *Drosophila* causes hemocyte migration deficits in embryos (Comber et al., 2013) and late pupal stages (Moreira et al., 2013), but a direct comparison between *Drosophila* and mouse macrophages is problematic. Hemocytes move in highly confined, fluid-filled spaces, where only over time these macrophages together with other cells deposit extracellular matrix (Matsubayashi et al., 2017; Sanchez-Sanchez et al., 2017). Thus, it remains unclear how these findings relate to macrophage behavior in geometrically complex, often matrix-rich interstitial spaces of mammalian tissues. Here, we systematically address how lack of integrin functionality influences macrophage motility in mouse tissues and 3D *in vitro* matrices, and how these cells adapt to a loss of adhesiveness. As the central point of this study, we investigate how the cell shape and the motility mode of individual cells influence the efferocytic efficiency of macrophage networks, and how perturbations on the single cell level may be compensated in a sampling phagocyte population.

## Results

### Haptokinetic random motility of macrophages in 3D matrices

Macrophages distribute homogeneously as cellular networks in most mouse tissues, as exemplified by tissue-resident macrophages of the brain-surrounding dura mater (Figure 1A). Studying network dynamics and migration of slow-migrating macrophages by two-photon intravital microscopy (2P-IVM) is however challenging and often limited to only a few hours. To overcome this restriction, we established an *in vitro* platform for the microscopic observation of macrophage network dynamics over 24 h and longer (Figure 1B and Video S1). We used primary mouse bone marrow-derived macrophages (BMDMs) (Weischenfeldt & Porse, 2008; Zajd et al., 2020), which were embedded into 3D matrigel. By combining this system with video-based brightfield microscopy, we monitored migration dynamics in

macrophage populations over 24–30 h and found that individual cells moved with mesenchymal-like elongated shapes at average speeds of  $\sim 0.6 \mu\text{m}/\text{min}$  (Figures 1C–1E). Treatment of BMDMs with the actin polymerization inhibitor cytochalasin D or the Rho-associated kinase (ROCK) inhibitor Y27632 revealed an essential requirement of actin polymerization and an important role of actomyosin contraction for macrophage random migration (Figures 1C–1E). To address the functional role of integrin-mediated adhesion, the third component determining cell migration, for macrophage 3D motility, we used different mouse crosses to generate BMDMs without functional high-affinity integrins (*Tln1*<sup>-/-</sup>) or without cell surface integrin heterodimers of the  $\beta 2$  family (*Itgb2*<sup>-/-</sup>) or  $\beta 1$  family (*Itgb1*<sup>-/-</sup>) (Figures S1A–S1C). *Tln1*<sup>-/-</sup> BMDMs, which are depleted of talin, a crucial interactor with integrin cytoplasmic domains for integrin activation (Calderwood & Ginsberg, 2003), showed roundish, amoeboid-like morphologies and severely impaired random migration (Figures 1F–1I and Video S2). Confocal fluorescence microscopy of Lifeact-GFP expressing BMDMs in 3D matrices clearly revealed that *Tln1*<sup>-/-</sup> cells were missing the prominent branched protrusions that gave WT macrophages their mesenchymal-like cell shape (Figure 1K). *Itgb2*<sup>-/-</sup> BMDMs lack  $\beta 2$  integrins on the cell surface, including the strongly expressed heterodimer  $\alpha\text{M}\beta 2$  (Mac-1), a characteristic macrophage cell surface protein with promiscuous binding properties to more than 30 non-protein and protein molecules, including several ECM components (Yakubenko et al., 2002) (Figure S1C). Surprisingly, ITGB2-deficiency did not result in cell shape changes or migration deficiencies (Figures 1F–1I). However, *Itgb1*<sup>-/-</sup> BMDMs that lack the important extracellular matrix (ECM)-binding heterodimers  $\alpha 5\beta 1$  and  $\alpha 6\beta 1$  on their cell surface, copied the morphology and migration phenotype of *Tln1*<sup>-/-</sup> BMDMs (Figures 1F–1I; Figure S1C). Thus, our results identify a crucial role of  $\beta 1$  integrins for the mesenchymal-like movement of macrophages, highlighting the substrate-dependent (haptokinetic) nature of 3D macrophage random migration. Loss of integrin functionality and the associated switch from mesenchymal-like to amoeboid morphology results in severely impaired 3D motility, which macrophages cannot compensate in contrast to many other immune cell types.

### **$\beta 1$ integrins determine the mesenchymal-like shape of macrophages in mouse tissues**

To corroborate the importance of our *in vitro* findings for living tissues, we investigated tissue-resident macrophages of mice with conditional *Itgb1* deletion in hematopoietic cells. This genetic approach allowed the efficient depletion of ITGB1 in hematopoietic stem cells and thus targeted also endogenous macrophages of different organs and ontogeny. Other genetic strategies (e.g. *Lyz2*<sup>CRE</sup>, *Cx3cr1*<sup>CRE</sup>) resulted in partial targeting of macrophage subsets or incomplete protein depletion, which did not provide conclusive *in vivo* results (data not shown). When we analyzed endogenous macrophage networks in several ECM-rich

tissues by immunofluorescence analysis, the comparison of *Vav-iCre Itgb1<sup>fl/fl</sup>* mice with littermate controls provided a clear morphological phenotype. In agreement with our findings from 3D matrigels, ITGB1 depletion caused macrophages in the interstitial spaces of the skin dermis (Figure 2A), the splenic red pulp (Figure 2B) and in the sinusoidal spaces of the liver (Figure 2C) to adopt a roundish, amoeboid-like cell shape. In contrast, macrophages in tissues of *Itgb2<sup>-/-</sup>* mice retained their mesenchymal-like morphologies (Figures S2A–S2C). Thus, our results confirm the crucial role of  $\beta$ 1 integrins for defining the mesenchymal-like shape of endogenous macrophages in several mouse tissues.

### Integrin-independent macrophage movement during chemotactic responses

As external guidance signals can induce cell polarization and directed migration, we next examined the chemotactic migration response of macrophages. We embedded BMDMs in 3D matrigel scaffolds and followed their directed migration along a gradient of the chemoattractant complement factor 5a (C5a) over 24 h (Figure 3A). We then assessed the contribution of actin polymerization, actomyosin contraction and integrin function to this process (Figures 3B and 3C). The effects of cytochalasin D and Y27632 treatment on chemotactic macrophage migration were comparable to our previous results on random motility (Figure 1C–1E), showing an essential requirement for actin polymerization and an important role for actomyosin contraction (Figures 3B, 3D and 3E). However, the dependency on integrin function was markedly different between random and chemotactic macrophage migration. In contrast to random motility, *Tln1<sup>-/-</sup>* and *Itgb1<sup>-/-</sup>* BMDMs, which had adopted more roundish and amoeboid-like shapes, moved at comparable average speeds to WT and *Itgb2<sup>-/-</sup>* BMDMs, which migrated with very elongated and mesenchymal-like morphologies along the C5a gradient (Figures 3C, 3F, 3G and Video S3). Track straightness and cell surface expression of C5aR1 were comparable between all gene variants (Figures S3A and S3B). Thus, chemotactic guidance cues can overcome the migration deficit of adhesion-deficient macrophages and induce productive amoeboid-like, integrin-independent macrophage movement.

### Amoeboid-like macrophages still perform chemotactic migration in mouse tissue

To confirm our findings *in vivo*, we chose to investigate the chemotactic response of tissue-resident macrophages to laser-induced wounds in the mouse dermis (Figure 4A). Previous intravital imaging studies in mice demonstrated wound attractants to induce chemotactic responses of several myeloid cell types, mostly neutrophils and tissue-resident macrophages (Lämmermann et al., 2013; Uderhardt et al., 2019). We crossed *Vav-iCre Itgb1<sup>fl/fl</sup>* mice with lysozyme M-GFP (*Lyz2<sup>GFP</sup>*) knock-in reporter mice to visualize dermal myeloid cells by two-photon intravital microscopy (2P-IVM). In agreement with our immunofluorescence analysis

of ear skin whole mount tissues (Figure 2A), 2P-IVM of GFP-positive macrophages in the unchallenged ear dermis confirmed that most ITGB1-deficient macrophages lacked the typical multi-protrusive mesenchymal-like phenotype of WT macrophages (Figure S4A). As neutrophils can influence macrophage dynamics at the wound site, we removed them from the blood circulation by administering Anti-Ly6G neutrophil-depleting antibodies. This experimental strategy allowed us to accurately analyze the functional contribution of  $\beta 1$  integrins in the chemotactic wound response of tissue-resident macrophages (Figure 4A). In contrast to our *in vitro* imaging over a whole day, 2P-IVM was limited to 90–120 minutes. Imaging WT macrophages at high magnification revealed that these cells quickly formed long protrusions toward the tissue lesion, while most cell bodies remained immotile during this short observation period (Figure 4B and Video S4). Although most *Itgb1*<sup>-/-</sup> macrophages displayed rounded morphologies in unchallenged skin, these cells also formed directed protrusions towards the damage site at comparable speeds to WT cells (Figures 4C, 4D and Video S4). We observed for *Itgb1*<sup>-/-</sup> macrophages a two-fold increase in cell body displacement (53 % of all analyzed *Itgb1*<sup>-/-</sup> cells, *N*=55) in comparison to WT macrophages (24 % of all analyzed WT cells, *N*=34), which we interpret as a switch to a more amoeboid migration mode (Figure 4E; Figure S4B and Video S4). Thus, our *in vivo* results confirm the dispensable role of integrins for the chemotactic response of macrophages. They also show that chemotactic cues are sufficient to polarize the macrophage cytoskeleton and support directed integrin-independent 3D protrusive movement. These findings expand our previous results on the chemotactic behavior of fast-migrating immune cells (dendritic cells, neutrophils, B cells) (Lämmermann et al., 2008) to a slower migrating tissue-resident immune cell type.

### Two efficient surveillance strategies for macrophage networks

Next, we investigated how cell shape changes and motility modes of individual macrophages influence the surveillance behavior of a whole macrophage network. To address this question, we adapted our 3D *in vitro* platform and added fluorescent beads with attached phosphatidylserine (PS) to macrophage populations in matrigel (Figure 5A). PS on the bead surface acted as an “eat-me” signal for macrophages (Segawa & Nagata, 2015), and a network of 400–500 macrophages was able to almost completely clear gels of a corresponding number of extracellular particles within 24 h (Figure 5B). Several hours after ingestion by macrophages, bead fluorescence was quenched due to the acidic environment of the phagolysosomal system, which could be measured as overall reduction in fluorescence (Figure S5A and S5B). Using this system, we set out to understand the cytoskeletal requirements of sampling macrophage populations. As expected, the complete stalling of migration and protrusion formation by cytochalasin D treatment inhibited

macrophage space exploration and bead uptake over 24 h (Figures 5C–5E). In contrast, lowering actomyosin contractility by Y27632 treatment did not impact the sampling efficiency of a macrophage population (Figures 5C–5E). Although individual BMDMs moved under these conditions at only ~ 30 % of their normal speed (Figure 1D–1E), their gain in single cell protrusiveness compensated for this reduction in speed and allowed Y27632-treated macrophage populations equal space exploration and bead uptake as control populations (Figures 5C and 5F; Figure S5C). Thus, macrophage networks can use two equally efficient surveillance strategies: (a) migration-based surveillance by low-protrusive cells (Figure 5G and Video S5), and (b) protrusion-based surveillance by low-migrating cells (Figure 5H and Video S5). Considering the broad heterogeneity of macrophages in mammalian tissues (Bleriot et al., 2020), this finding is very relevant and highlights that efficient tissue surveillance can be realized by macrophage subsets with migratory potential, but also by macrophage subsets with sessile, but protrusive behaviors.

#### Haptokinesis is required for optimal bead removal by macrophage networks

We then investigated how integrin-dependent haptokinesis influences the sampling efficiency of macrophage networks. We found that integrin-dependent deficits in macrophage random motility (Figures 1F–1I) translated directly to impaired removal of extracellular particles in matrigel (Figures 5I–5L). Although *Tln1*<sup>-/-</sup> and *Itgb1*<sup>-/-</sup> BMDMs had comparable phagocytic activity to WT controls when macrophages were kept as cell suspensions during the incubation with PS-attached beads (Figure S5D), these mutant BMDMs showed clearly reduced bead internalization in the 3D matrix (Figure 5K and 5L; Figure S5E). Impaired haptokinesis of amoeboid-shaped *Tln1*<sup>-/-</sup> and *Itgb1*<sup>-/-</sup> BMDMs impeded efficient space exploration and bead sampling, which was not observed for mesenchymal-like migrating *Itgb2*<sup>-/-</sup> BMDMs (Figures 5I–5L; Figure S5E). Live cell imaging analysis revealed that the rudimentary movement of *Itgb1*<sup>-/-</sup> BMDMs was sufficient to sample beads in close vicinity to them, but the restricted movement radius prevented bead sampling of larger areas (Figure 5M and Video S6). However, we could rescue this surveillance deficit of *Itgb1*<sup>-/-</sup> BMDM networks by doubling the cell number in the macrophage population (Figures 5N and 5O). This result appears particularly relevant for physiological mammalian tissues, where the additional recruitment of monocytic cells or macrophages might compensate for insufficient space exploration of a tissue-resident macrophage network.

#### Haptokinesis is required for optimal efferocytosis by macrophage networks

The removal of dead cell material is best described as a sequential series of cell biological events divided into “find-me”, “eat-me” and “digest-me” phases (Lemke, 2019). To realize “eat-me”, individual macrophages are considered to chemotactically respond to “find-me”



signals released from dead cells, a process that involves the formation of directed protrusions and subsequent cell displacement. However, it still remains unresolved which mechanisms guide and coordinate the dynamics of individual cells in macrophage networks where many phagocytes act together, but also compete for dead cell material. Given our disparate findings on integrin-dependent random motility and integrin-independent chemotactic responses of macrophages, we were particularly interested how loss of integrin functionality influences the sampling dynamics of macrophage networks. To study the efferocytosis response of macrophage populations, we added aged, fluorescently labeled mouse neutrophils to BMDM networks (Figure 6A). Aged neutrophils underwent cell death over time, and we used pHrodo-Red as fluorescent dye to label them. Efferocytosis was extremely efficient and a network of 300–400 macrophages was able to remove 500–700 dead neutrophils within 24–30 h (Figure 6B and Video S7). We observed that pHrodo fluorescence after the reported increase shortly after ingestion vanished inside macrophages several hours after neutrophil uptake, probably due to digestion of the corpse. We used this to measure the efferocytosis efficiency of BMDM networks as fluorescence decline, which we quantified by using two independent analysis programs (Figure 6C; Figure S6B). Microscopic observation of individual WT BMDMs revealed a spectrum of mesenchymal-like movement behaviors that supported efficient efferocytosis, including individual macrophages that sequentially ingested 8–14 cells over 24–30 h (Figure S6C and Video S8). Testing the efferocytic capacity of integrin-deficient BMDM networks, we made again the striking observation that  $\beta 1$  integrin-dependent haptokinesis was crucial for optimal surveillance. As observed for the sampling of PS-attached beads that do not release “find-me” signals, networks of *Tln1*<sup>-/-</sup> and *Itgb1*<sup>-/-</sup> BMDMs were significantly impaired in the removal of dead neutrophils. The phenotype of *Tln1*<sup>-/-</sup> BMDMs was even more pronounced in comparison to *Itgb1*<sup>-/-</sup> BMDMs, probably due to migration-independent effects of talin on  $\alpha v$  integrins, which contribute to dead cell recognition and uptake (Lemke, 2019). In contrast, *Itgb2*<sup>-/-</sup> BMDMs showed similar efferocytic activities as WT cells (Figures 6C and 6D; Figures S6B and S6D). Haptokinetic movement of mesenchymal-shaped WT BMDMs at speeds of  $\sim 0.6 \mu\text{m}/\text{min}$  supported efficient sampling of corpses and surveillance of large areas (Figure 6E and Video S9), whereas impaired haptokinesis of *Itgb1*<sup>-/-</sup> BMDMs restricted surveillance to smaller regions (Figure 6F and Video S9). Although individual *Itgb1*<sup>-/-</sup> macrophages could ingest several dead neutrophils, the slow amoeboid-like movement limited their efferocytic sampling to only nearby corpses (Figure S6E). Thus, our results show an important role for  $\beta 1$  integrins in controlling macrophage movement and protrusiveness, and further highlight haptokinetic sampling as a crucial process for efficient efferocytosis in macrophage networks.

### **$\beta$ 1 integrin-dependent surveillance by cortical macrophage networks in lymph nodes**

To show the relevance of our *in vitro* findings for mammalian tissues, we chose to study macrophages located in the T cell cortex of mouse lymph nodes (Figure 7A). These cortical macrophages sit on an ECM-rich reticular fiber scaffold, where they form dense cellular networks (Bellomo et al., 2018). Previous work has shown that this tissue-resident macrophage type acts as the only professional phagocyte that continuously clears apoptotic cells in the T cell zone of lymph nodes (Baratin et al., 2017). Confocal immunofluorescence analysis revealed dense networks of cortical macrophages with elongated protrusions and multi-branched, mesenchymal-like shapes in the T cell zones of WT mice (Figure 7B). In contrast, cortical macrophages in lymph nodes of conditional *Itgb1* knockout mice were more roundish and showed amoeboid-like morphologies (Figure 7B). To evaluate the efferocytic efficiency of cortical macrophage networks, we used the TUNEL method to detect and quantify apoptotic cells in the T cell zones of lymph nodes. TUNEL-positive cells were mostly detected inside cortical macrophages, but were also observed at lower numbers outside the macrophage network (Figure 7C). Importantly, mice with *Itgb1*-deficient macrophages showed a significantly increased number of extracellular, non-internalized apoptotic cells in T cell zones in comparison to littermate control mice (Figure 7D). Thus, our results confirm the important role of  $\beta$ 1 integrin-dependent mesenchymal-like cell shape and motility for efferocytic macrophage networks *in vivo*.

## Discussion

Given their many important physiological roles, macrophages have evolved mechanisms that ensure robust phago- and efferocytosis. Recent work in *Drosophila* embryos have strengthened this view by showing that hemocytes utilize two distinct modes of engulfment, “lamellipodial” and “filopodial” phagocytosis, which provide individual cells phagocytic plasticity to fulfill their clearance functions (Davidson & Wood, 2020a). Similar to this previous study, the removal of microbes and dead cells by macrophages has mostly been studied from the viewpoint of a single cell, trying to understand the molecular details of foreign material recognition and uptake (Elliott & Ravichandran, 2016; Mylvaganam et al., 2021; Vorselen et al., 2020). However, mammalian macrophages form cellular networks in almost all tissues, making tissue surveillance a “group effort” of many individual macrophages. This population behavior is important for the removal of dead cell material in tissues, where the efficiency of detecting, engulfing and clearing dead cell corpses depends on the efferocytic capacity of a whole macrophage population, which sometimes even requires additional support from non-professional phagocytes (Damisah et al., 2020; Han et al., 2016). Hence, it is evident that molecules recognizing “find-me” and “eat-me” signals and their surface expression levels on individual cells are important determinants for the efferocytic capacity of macrophage populations (Hughes et al., 2021; Rothlin & Ghosh, 2020).

Here, we investigated how the cell shape and the motility mode of individual macrophages influence the efferocytic capacity of macrophage networks. Our study sought to determine the critical and non-critical parameters that shape the dynamic surveillance behavior of macrophage networks in 3D environments. In particular, we focused on the cytoskeletal control of macrophage motility and migration, the basic processes that enable the formation of directed cell protrusions and displacement and thus realize the interstitial recruitment preceding the engulfment of dead cell corpses. Our findings expand the concept of plasticity to modes of tissue surveillance in macrophage networks. We show that actomyosin contractility is non-critical for sampling macrophage populations, as they can survey their surrounding by two equally efficient strategies: (a) migration-based surveillance by contractile, low-protrusive cells, or (b) protrusion-based surveillance by less contractile, low-migrating cells. We speculate that both surveillance modes are likely reflected in the heterogeneity of resident macrophages in mammalian tissues (Bleriot et al., 2020; Cox et al., 2021), contributing to the robustness of macrophage network function. Although we know that macrophages of different developmental origin co-exist in many tissues (Bleriot et al., 2020; Cox et al., 2021), we have only limited understanding about their cytoskeletal properties. In future studies it will be interesting to address how distinct macrophage subsets

differ in their protrusive and contractile forces and how these factors determine the surveillance potential and adaptation of macrophages to a specific tissue compartment ([Okabe & Medzhitov, 2016](#)).

As the most important result of our study, we identify that both surveillance strategies critically depend on haptokinesis. Integrin  $\beta$ 1-mediated substrate binding controls the 3D mesenchymal-like shape, movement, lamellopodial protrusiveness and space exploration of individual cells in a sampling macrophage network. Loss of  $\beta$ 1 integrin function switches the cells to an amoeboid-like morphology, which does not support random motility and the sampling of particles or dead cells by the macrophage network. In contrast to many other immune cell types ([Lämmermann & Germain, 2014](#)), we find that randomly migrating mouse macrophages cannot compensate for the loss of integrin function and the associated switch from a mesenchymal-to an amoeboid-like morphology. Previous studies with zebrafish macrophages and human monocyte-derived macrophages (hMDMs) in 3D matrix gels detected integrin-dependent adhesion structures ([Barros-Becker et al., 2017](#); [Van Goethem et al., 2011](#)), but the functional consequences of integrin depletion for migration remained unexplored. Similar to immature dendritic cells ([Gawden-Bone et al., 2014](#)), mammalian macrophages form integrin-dependent focal adhesions and podosomes on 2D surfaces ([Owen et al., 2007](#); [Wiesner et al., 2014](#)). Interestingly, studies with hMDMs invading 3D collagen gels found classical focal adhesion and podosome components (e.g. talin, paxillin, vinculin) at the tip of F-actin-rich cell protrusions together with  $\beta$ 1 integrins ([Van Goethem et al., 2011](#); [Wiesner et al., 2014](#)). However, the exact nature of the integrin-dependent adhesion structure promoting macrophage 3D migration remains to be explored in future studies.

To our surprise, we find contrasting integrin demands of random and chemotactic macrophage migration. When talin- or  $\beta$ 1 integrin-deficient macrophages were exposed to gradients of high C5a attractant concentrations, these amoeboid-shaped cells polarized their leading edges toward the attractant source and moved chemotactically with speeds similar to control cells. This behavior is reminiscent of integrin-independent 3D chemotaxis of dendritic cells and neutrophils ([Lämmermann et al., 2008](#)), but at six- to sixteen-fold lower average speeds, respectively. Studies in *Drosophila* had shown varying results on integrin-dependence for the directed migration of hemocytes toward laser-induced tissue injuries ([Comber et al., 2013](#); [Moreira et al., 2013](#)). Our 2P-IVM experiments on mouse skin confirmed that dermal macrophages do not require  $\beta$ 1 integrins during their chemotactic response toward local gradients of wound attractants. Thus, strong chemotactic signals can

induce and maintain the polarization of the macrophage actomyosin cytoskeleton, enabling productive migration in the absence of integrin-dependent substrate binding.

When macrophages survey their surrounding for dead cells, they are considered to sense attractants released from dying cells, so called “find-me” signals, which initiate the formation of directed protrusions and cell displacement toward the dead cell material (Elliott & Ravichandran, 2016; Lemke, 2019; Rothlin et al., 2021). Although we showed that integrin receptors were dispensable for 3D macrophage chemotaxis, integrin-mediated movement and protrusiveness was absolutely critical for efferocytosis by a surveying macrophage network. We speculate that individual dying cells release only low amounts of attractants, which generate chemotactic signals that are too weak and transient to support the full polarization of the macrophage cytoskeleton in the absence of functional integrins. Thus, integrin-dependent stabilization of the mesenchymal-like cell shape is crucial for efficient efferocytosis by macrophage networks. Insufficient haptokinetic sampling compromises the efferocytic activity of macrophage networks, as shown for  $\beta 1$  integrin-deficient lymph node cortical macrophages whose clearance of apoptotic T cells was impaired.

Our results are particularly relevant for ECM-rich tissues where  $\beta 1$  integrins define the mesenchymal-like shape of endogenous macrophages. Macrophages in the skin dermis and dura mater interact with fibrillar interstitial matrix and basement membranes (BMs), splenic red pulp and lymph node cortical macrophages locate on top of BM-rich reticular fiber networks, and intravascular Kupffer cells align along the BMs of liver sinusoids. In all these examples, other integrin family members or adhesion receptor systems could not compensate the loss of  $\beta 1$  integrins and restore the mesenchymal-like shape of endogenous macrophages.  $\beta 2$  integrins, which are abundantly expressed on macrophages, appear not to be involved in pro-migratory mechanotransduction in these interstitial environments, and likely serve other macrophage functions (e.g. pattern recognition, complement- and IgG-mediated phagocytosis, cell retention) (Cui et al., 2018; Jaumouille et al., 2019; Torres-Gomez et al., 2020).  $\alpha V$  integrins, which we did not target in this study, may also rather support other macrophage functions (e.g., apoptotic cell uptake, TGF $\beta$  activation) (Kelly et al., 2018; Lemke, 2019). For organs and tissue compartments with largely cellular composition (e.g., brain, glands, epithelial layers), the maintenance of the mesenchymal-like macrophage phenotype may not necessarily require integrin-dependent ECM binding (Brand et al., 2020; Meller et al., 2017). Instead, haptokinesis for efficient macrophage surveillance might be realized by other adhesion receptor systems, whose identification requires more systematic studies for many of these tissues.

In summary, our study highlights macrophages as a tissue-resident immune cell type that does not follow the general prevailing paradigm of integrin-independent 3D migration of immune cells. Substrate-dependent movement and protrusiveness are critical determinants for space exploration and efficient sampling of macrophage networks. Thus, integrins are not only critical for the migratory processes of intravascular crawling ([Neupane et al., 2020](#)), extravasation ([Nourshargh et al., 2010](#)) and invasion ([Arasa et al., 2021](#)), but also crucial for the interstitial movement of myeloid immune cell subsets. Our mechanistic insights will also likely be relevant for other tissue-resident immune cell types, which have not yet been studied in detail.

## Materials and Methods

### Key resources table

| REAGENT TYPE or RESOURCE | DESIGNATION                                                  | SOURCE                   | IDENTIFIER or REFERENCE            |
|--------------------------|--------------------------------------------------------------|--------------------------|------------------------------------|
| Antibody                 | Armenian Hamster Anti-CD61 (Integrin beta 3) PE-conjugated   | BD Biosciences           | Cat# 553347; RRID: AB_394800       |
| Antibody                 | Armenian Hamster Anti-CD29 (Integrin beta 1) PE-conjugated   | BioLegend                | Cat# 102208; RRID: AB_312885       |
| Antibody                 | Armenian Hamster IgG Isotype Control PE-conjugated           | BioLegend                | Cat# 400907; RRID: AB_326593       |
| Antibody                 | Donkey anti-goat Alexa Fluor 488-conjugated                  | Thermo Fisher Scientific | Cat# A11055; RRID: AB_2534102      |
| Antibody                 | Donkey anti-rabbit Alexa Fluor 568-conjugated                | Thermo Fisher Scientific | Cat# A10042; RRID: AB_2534017      |
| Antibody                 | Goat Anti-GFP Dylight™ 488-conjugated                        | Rockland                 | Cat# 600-141-215; RRID: AB_1961516 |
| Antibody                 | Goat Anti-rabbit Alexa Fluor 405-conjugated                  | Thermo Fisher Scientific | Cat# A-31556; RRID: AB_221605      |
| Antibody                 | Goat Anti-rabbit Alexa Fluor 700-conjugated                  | Thermo Fisher Scientific | Cat# A21038 RRID: AB_10373851      |
| Antibody                 | Goat Anti-collagen IV                                        | Merck Millipore          | Cat# AB769 RRID: AB_92262          |
| Antibody                 | Mouse Anti-talin                                             | Sigma-Aldrich            | Cat# T3287 RRID: AB_477572         |
| Antibody                 | Rabbit Anti-actin                                            | Sigma-Aldrich            | Cat# A2066; RRID: AB_476693        |
| Antibody                 | Rabbit Anti-collagen IV                                      | Abcam                    | Cat# ab19808; RRID: AB_445160      |
| Antibody                 | Rabbit Anti-Iba1                                             | Wako                     | Cat# 019-19741; RRID: AB_839504    |
| Antibody                 | Rabbit Anti-LYVE1                                            | Abcam                    | Cat# AB14917 RRID: AB_301509       |
| Antibody                 | Rabbit Anti-mouse HRP-conjugated                             | Agilent Dako             | Cat# P0161; RRID: AB_2687969       |
| Antibody                 | Rat Anti-CD11b (Integrin alpha M) PE-conjugated              | BD Biosciences           | Cat# 557397; RRID: AB_396680       |
| Antibody                 | Rat Anti-CD16/CD32 Antibody                                  | BD Biosciences           | Cat# 553142; RRID: AB_394657       |
| Antibody                 | Rat Anti-CD18 (Integrin beta 2) PE-conjugated                | BD Biosciences           | Cat# 553293; RRID: AB_394762       |
| Antibody                 | Rat Anti-CD49d (Integrin alpha 4) PE-conjugated              | Thermo Fisher Scientific | Cat# 12-0492-82; RRID: AB_465697   |
| Antibody                 | Rat Anti-CD49e (Integrin alpha 5) PE-conjugated              | BD Bioscience            | Cat# 557447 RRID: AB_396710        |
| Antibody                 | Rat Anti-CD49f (Integrin alpha 6) Alexa Fluor 488-conjugated | BioLegend                | Cat# 313608; RRID: AB_493635       |
| Antibody                 | Rat Anti-CD45R/B220 Brilliant violet 421-conjugated          | BD Bioscience            | Cat# 562922 RRID: AB_2737894       |
| Antibody                 | Rat Anti-CD51 (Integrin alpha V) PE-conjugated               | BD Biosciences           | Cat# 551187; RRID: AB_394088       |
| Antibody                 | Rat Anti-CD68 Alexa Fluor 488-conjugated                     | Biolegend                | Cat#137011 RRID: AB_2074847        |
| Antibody                 | Rat Anti-CD206 PE-Dazzle™                                    | Biolegend                | Cat#141731 RRID: AB_2565931        |
| Antibody                 | Rat Anti-F4/80 Brilliant violet 421-conjugated               | Biolegend                | Cat# 123137 RRID: AB_2563102       |
| Antibody                 | Rat Anti-F4/80 PE-conjugated                                 | Thermo Fisher Scientific | Cat# MF48004; RRID: AB_10372666    |
| Antibody                 | Rat Anti-F4/80 Alexa Fluor 647-conjugated                    | Thermo Fisher Scientific | Cat# 50-4801-82 RRID: AB_11149361  |
| Antibody                 | Rat Anti-Integrin β7 Chain PE-conjugated                     | BD Biosciences           | Cat# 557498; RRID: AB_396735       |

|                                  |                                                                                 |                                                                                           |                                      |
|----------------------------------|---------------------------------------------------------------------------------|-------------------------------------------------------------------------------------------|--------------------------------------|
| Antibody                         | Rat IgG1 kappa Isotype Control PE-conjugated                                    | Thermo Fisher Scientific                                                                  | Cat# 12-4301-81;<br>RRID: AB_470046  |
| Antibody                         | Rat IgG2a Isotype Control Alexa Fluor 488-conjugated                            | Thermo Fisher Scientific                                                                  | Cat# R2a20;<br>RRID: AB_2556535      |
| Antibody                         | Rat IgG2a kappa Isotype Control PE-conjugated                                   | Thermo Fisher Scientific                                                                  | Cat# 12-4321-80;<br>RRID: AB_1834380 |
| Antibody                         | Rat IgG2b kappa Isotype Control PE-conjugated                                   | Thermo Fisher Scientific                                                                  | Cat# 12-4031-82;<br>RRID: AB_470042  |
| Antibody                         | Rat anti-Ly6G                                                                   | Bio X Cell                                                                                | Cat# BE0075-1;<br>RRID: AB_1107721   |
| Recombinant protein              | Annexin V PE-conjugated                                                         | Biolegend                                                                                 | Cat# 640908                          |
| Recombinant protein              | Recombinant Murine M-CSF                                                        | PeptoTech                                                                                 | Cat# 315-02                          |
| Chemical, compound, drug         | cOplete™, Protease Inhibitor Cocktail (PIC)                                     | Sigma-Aldrich                                                                             | Cat# 11697498001                     |
| Chemical, compound, drug         | Fluoromount G® Mounting Medium                                                  | SouthernBiotech                                                                           | Cat# 0100-01                         |
| Chemical, compound, drug         | Matrigel® Basement Membrane Matrix                                              | Corning                                                                                   | Cat# 354234                          |
| Chemical, compound, drug         | Matrigel® Growth Factor Reduced (GFR) Basement Membrane Matrix, Phenol Red-free | Corning                                                                                   | Cat# 356231                          |
| Chemical, compound, drug         | Cytochalasin D                                                                  | Merck                                                                                     | Cat# 250255                          |
| Chemical, compound, drug         | Y-27632                                                                         | Merck                                                                                     | Cat# 688001                          |
| Chemical, compound, drug         | pHrodo™ Red SE                                                                  | Thermo Fisher Scientific                                                                  | Cat# P36600                          |
| Chemical, compound, drug         | PS Lipid Microparticles                                                         | Echelon Bioscience                                                                        | Cat# P-B1PS                          |
| Chemical, compound, drug         | Tissue Tek™                                                                     | Sakura                                                                                    | Cat# 4583                            |
| Chemical, compound, drug         | DAPI                                                                            | Sigma-Aldrich                                                                             | Cat# D9542                           |
| Commercial assay, kit            | Click-iT™ Plus TUNEL assay                                                      | Thermo Fisher Scientific                                                                  | Cat# C10618                          |
| Commercial assay, kit            | Dead Cell Removal Kit                                                           | Miltenyi Biotec                                                                           | Cat# 130-090-101                     |
| Commercial assay, kit            | Neutrophil Isolation Kit                                                        | Miltenyi Biotec                                                                           | Cat# 130-097-658                     |
| Commercial assay, kit            | Clarity™ Western ECL Substrate                                                  | Bio-Rad                                                                                   | Cat# 170-5060                        |
| Experimental model, mouse strain | Mouse: Itgb1 <sup>fl/fl</sup> ; Itgb1 <sup>tm1Ret</sup>                         | (Potocnik et al., 2000), provided by R. Fässler (MPI of Biochemistry, Martinsried)        | MGI:1926498                          |
| Experimental model, mouse strain | Mouse: Tln1 <sup>fl/fl</sup> ; Tln1 <sup>tm4.1Crt</sup>                         | (Petrich et al., 2007), provided by S. Monkley and D. Critchley (University of Leicester) | MGI:3770513                          |
| Experimental model, mouse strain | Mouse: Itgb2 <sup>2-/-</sup> ; Itgb2 <sup>tm2Bay</sup>                          | (Scharffetter-Kochanek et al., 1998), provided by M. Sixt (IST, Klosterneuburg)           | MGI: 1861705<br>JAX: 003329          |
| Experimental model, mouse strain | Mouse: Vav-iCre; Commd10 <sup>Tg(Vav1-iCre)A2Kio</sup>                          | (de Boer et al., 2003), Jackson Laboratory                                                | MGI: 2449949<br>JAX: 008610          |
| Experimental model, mouse strain | Mouse: Cx3cr1 <sup>CRE</sup> ; Cx3cr1 <sup>tm1.1(cre)Jung</sup>                 | (Yona et al., 2013), Jackson Laboratory                                                   | MGI: 5467983<br>JAX: 025524          |



|                                  |                                                                                 |                                                                              |                                                                                                                                                                                                                                                                                                 |
|----------------------------------|---------------------------------------------------------------------------------|------------------------------------------------------------------------------|-------------------------------------------------------------------------------------------------------------------------------------------------------------------------------------------------------------------------------------------------------------------------------------------------|
| Experimental model, mouse strain | Mouse: Lifeact-GFP: Tg(CAG-EGFP)#Rows                                           | (Riedl et al., 2010), provided by R. Wedlich-Söldner (University of Münster) | MGI: 4831036                                                                                                                                                                                                                                                                                    |
| Experimental model, mouse strain | Mouse: Lyz2 <sup>GFP</sup> : Lyz2 <sup>tm1.1Graf</sup>                          | (Faust et al., 2000), provided by T. Graf(CRG, Barcelona)                    | MGI: 2654931                                                                                                                                                                                                                                                                                    |
| Experimental model, mouse strain | Mouse: Vav-iCre <sup>+/-</sup> Itgb1 <sup>fl/fl</sup>                           | In-house breeding (this paper)                                               |                                                                                                                                                                                                                                                                                                 |
| Experimental model, mouse strain | Mouse: Vav-iCre <sup>+/-</sup> Itgb1 <sup>fl/fl</sup> Lyz2 <sup>GFP/+</sup>     | In-house breeding (this paper)                                               |                                                                                                                                                                                                                                                                                                 |
| Experimental model, mouse strain | Mouse: Cx3cr1 <sup>CRE/+</sup> Tln1 <sup>fl/fl</sup>                            | In-house breeding (this paper)                                               |                                                                                                                                                                                                                                                                                                 |
| Experimental model, mouse strain | Mouse: Cx3cr1 <sup>CRE/+</sup> Tln1 <sup>fl/fl</sup> Lifeact-GFP <sup>+/-</sup> | In-house breeding (this paper)                                               |                                                                                                                                                                                                                                                                                                 |
| Software, algorithm              | Adobe Illustrator 2019                                                          | Adobe                                                                        | <a href="https://www.adobe.com">https://www.adobe.com</a>                                                                                                                                                                                                                                       |
| Software, algorithm              | BD FACSDiva v6                                                                  | BD                                                                           | <a href="https://www.bdbiosci.com/en-us/instruments/research-instruments/research-software/flow-cytometry-acquisition/facsddiva-software">https://www.bdbiosci.com/en-us/instruments/research-instruments/research-software/flow-cytometry-acquisition/facsddiva-software</a>                   |
| Software, algorithm              | Fiji, ImageJ2                                                                   | (Rueden et al., 2017; Schindelin et al., 2012)                               | <a href="https://imagej.net">https://imagej.net</a>                                                                                                                                                                                                                                             |
| Software, algorithm              | FlowJo v10.8.0                                                                  | BD                                                                           | <a href="https://www.flowjo.com">https://www.flowjo.com</a>                                                                                                                                                                                                                                     |
| Software, algorithm              | GraphPad Prism Version 8                                                        | GraphPad                                                                     | <a href="https://www.graphpad.com">https://www.graphpad.com</a>                                                                                                                                                                                                                                 |
| Software, algorithm              | Image Lab™ Software                                                             | Bio-Rad                                                                      | <a href="https://www.bio-rad.com/de-at/product/image-lab-software">https://www.bio-rad.com/de-at/product/image-lab-software</a>                                                                                                                                                                 |
| Software, algorithm              | Imaris v9.5 to 9.7                                                              | Bitplane                                                                     | <a href="https://imaris.oxinst.com/versions/9-5">https://imaris.oxinst.com/versions/9-5</a>                                                                                                                                                                                                     |
| Software, algorithm              | ZEN 2012 SP5 FP3 (black)                                                        | ZEISS Microscopy                                                             | <a href="https://www.zeiss.com/microscopy/int/products/microscope-software/zen.html#modules">https://www.zeiss.com/microscopy/int/products/microscope-software/zen.html#modules</a>                                                                                                             |
| Software, algorithm              | Incucyte Base Software                                                          | Incucyte                                                                     | <a href="https://www.sartorius.com/en/products/live-cell-imaging-analysis/live-cell-analysis-software/incucyte-base-software">https://www.sartorius.com/en/products/live-cell-imaging-analysis/live-cell-analysis-software/incucyte-base-software</a>                                           |
| Software, algorithm              | Incucyte Spheroid Analysis Software Module                                      | Incucyte                                                                     | <a href="https://www.sartorius.com/en/products/live-cell-imaging-analysis/live-cell-analysis-software/incucyte-base-software">https://www.sartorius.com/en/products/live-cell-imaging-analysis/live-cell-analysis-software/incucyte-base-software</a>                                           |
| Software, algorithm              | Ibidi chemotaxis and migration tool                                             | Ibidi                                                                        | <a href="https://ibidi.com/chemotaxis-analysis/171-chemotaxis-and-migration-tool.html?gclid=EAlaIqobChMI2c2LtcW8wIVgrh3Ch2B8wV9EAYASAAEgLMbvD_BwE">https://ibidi.com/chemotaxis-analysis/171-chemotaxis-and-migration-tool.html?gclid=EAlaIqobChMI2c2LtcW8wIVgrh3Ch2B8wV9EAYASAAEgLMbvD_BwE</a> |

## Experimental Model

### Mouse models

All used mouse strains and crosses were on a C57BL/6J background and are listed in the Key Resources Table. *Itgb1<sup>fl/fl</sup>* (Potocnik et al., 2000), *Tln1<sup>fl/fl</sup>* (Petrich et al., 2007), *Itgb2<sup>+/-</sup>*

(Scharffetter-Kochanek et al., 1998), *Commd10*<sup>Tg(Vav1-icre)</sup> (de Boer et al., 2003), *Cx3cr1*<sup>CRE</sup> (Yona et al., 2013), *Tg(Lifeact-GFP)* (Riedl et al., 2010), and *Lyz2*<sup>GFP</sup> (Faust et al., 2000) mouse strains have been described elsewhere. Mice were maintained in a conventional animal facility at the Max Planck Institute of Immunobiology and Epigenetics according to local regulations. Animal breeding and husbandry were performed in accordance with the guidelines provided by the Federation of European Laboratory Animal Science Association and by German authorities and the Regional Council of Freiburg. All mouse strains in this study were without health burden. Mouse strains without fluorescent reporter lines and mouse crosses with *Tg(Lifeact-GFP)* were only used for organ removal after euthanasia by carbon dioxide exposure. *Vav-iCre Itgb1*<sup>fl/fl</sup> *Lyz2*<sup>GFP/+</sup> and WT *Lyz2*<sup>GFP/+</sup> control mice were used for two-photon intravital microscopy. Adult mice (>8 weeks) were age- and sex-matched in all experiments, and littermate animals were used as controls in most experiments. For Cre-expressing mouse strains, Cre-expressing littermate control animals were preferred. A contribution of Cre expression to biological phenotypes was never observed and ruled out through control experiments. Intravital imaging experiments were performed according to study protocols approved by the German authorities and the Regional Council of Freiburg (35-9185.81/G-18/111).

## Method details

### **Ear skin and dura mater whole mount staining**

Whole mounts of murine ear skin were prepared by splitting the ear in half and by separating the dermal tissue from the cartilage. Split ears were fixed in 1 % PFA in PBS for 16 h at 4 °C. The tissue was then blocked and permeabilized by incubating it in wash/staining solution (0.2 % Triton™ X-100, 1 % bovine serum albumin (BSA; Sigma Aldrich) in PBS) for 16 h on a plate shaker. Primary antibody staining was performed for 16 h shaking at 4 °C. Subsequently, the tissue was washed three times for 15 min at room temperature in wash/staining solution. Samples were stained with secondary antibody solution for 16 h shaking at 4 °C, followed by an additional three washing steps. To isolate dura mater whole mounts, the cranium skull together with the dura mater were dissected and placed in 4% PFA for 4 h at 4 °C. The Dura mater was then peeled away from the cranium skull bones and stained in the same manner as ear skin whole mounts. Antibodies used for labeling ear skin whole mounts were: anti-collagen IV (1:500, abcam), anti-rabbit Alexa Fluor 405 (1:300, Thermo Fisher Scientific), and anti-CD206 (1:200, Biolegend). Antibodies used for labeling dura maters were: anti-Iba1 (1:200, Wako), anti-collagen IV (1:200, Merck Millipore), anti-goat Alexa Fluor 488 (1:300, Thermo Fisher Scientific) and anti-rabbit Alexa Fluor 568 (1:300, Thermo Fisher Scientific). The tissues were mounted on Superfrost™ glass slides

(Thermo Fisher Scientific) with a coverglass and Fluoromount-G (SouthernBiotech). Image acquisition was performed using a LSM 780 microscope (Zeiss) with a Plan-Apochromat 20× M27 objective (Zeiss) as well as with a Plan-Apochromat 40×/1.4 Oil DIC M27 objective.

### ***Mouse bone marrow-derived macrophage culture***

Bone marrow-derived mouse macrophages (BMDM) were generated from bone marrow precursors by standard M-CSF culture. Os coxae, tibia and femora were dissected from mice and the bone marrow flushed with RPMI. The resulting bone marrow suspension was passed through a 70 µm filter and pelleted in a centrifuge at 330 x g for 5 min. Upon re-suspension cells were counted and re-suspended at  $5 \times 10^6$  cells/ml in heat-inactivated fetal calf serum (FCS) with 10 % DMSO and stored at -80 °C until usage. For macrophage differentiation, frozen bone marrow cells were defrosted, washed once with 20 ml RPMI (37 °C) at 330 × g for 5 min and re-suspended in 10 ml of macrophage medium (RPMI, 10 % FCS, 1 % penicillin/streptomycin and 20 ng/ml M-CSF). The cell suspension was plated on a 10 cm petri dish and incubated at 37 °C, 5 % CO<sub>2</sub> (day 0). On days 3 and 5 of the culture, 5 ml of fresh macrophage medium was added on top of the pre-existing medium. Cells were harvested with 20 mM EDTA at day 6 of differentiation. Dead cells were removed using a dead cell removal kit (Miltenyi Biotec) prior to any experiment, in accordance with the manufacturer's instructions.

### ***Flow cytometry***

BMDMs were harvested as described before and Fc receptors were blocked with an anti-mouse CD16/CD32 antibody (1:250, BD Biosciences) in FACS buffer (5 % heat-inactivated FCS, 2 mM EDTA in PBS) for 10 min at room temperature. Cells were stained with the desired antibody cocktail for 30 min on ice, followed by 3 wash steps with FACS buffer (5 min at 300 × g). Cells were resuspended in DAPI solution (0.5 µg DAPI in FACS buffer) and incubated for 10 min at room temperature. The cells were then analyzed using an LSR III or LSRFortessa™ (BD Biosciences) flow cytometer. Data were processed with the FlowJo™ software (BD Bioscience), where the integrin expression of living (DAPI negative) F4/80-expressing cells (1:100, Invitrogen) was analyzed. Antibodies used were: PE-conjugated anti-CD29 (1:400, Biolegend), PE-conjugate anti-CD11b (1:400, BD Bioscience), Alexa Fluor 488-conjugated anti-CD49f (1:400, Biolegend), rat IgG2a kappa isotype control (1:400, Thermo Scientific), armenian hamster IgG isotype control (1:400, Biolegend), rat IgG1 kappa isotype control (1:400, Thermo Fisher Scientific), anti-integrin β7 chain (1:400, BD Bioscience), rat IgG2a isotype control (1:400, Thermo Fisher Scientific), rat IgG2b kappa isotype control (1:400, Thermo Fisher Scientific), anti-CD18 (1:400, BD Bioscience), anti-CD49d (1:400, Thermo Scientific), anti-CD51 (1:400, BD Bioscience), anti-CD61 (1:400, BD

Bioscience), anti-CD49e (1:400, BD Bioscience) and rat IgG1 kappa isotype control (1:400, Thermo Fisher Scientific). To assess phagocytosis of macrophages in suspension, a 2:1 ratio of fluorescent phosphatidylserine-attached beads and BMDMs suspended in macrophage medium were incubated for 2 h on a shaker at 37 °C and 700 rpm. Afterwards cells were Fc blocked in annexin-binding buffer (135 mM NaCl, 5 mM KCl, 5.6 mM glucose, 1.8 mM CaCl<sub>2</sub>, 1 mM MgCl<sub>2</sub> and 20 mM HEPES, pH 7.3) using CD16/32 blocking antibodies (1:250, BD Biosciences), which was followed by labeling in annexin-binding buffer with anti-F4/80 antibodies (1:100, Invitrogen) and annexin V (1:50, Biolegend) for 25 min at 4 °C. Cells were then washed two times and re-suspended in annexin-binding buffer containing 0.5 µg/ml DAPI. Results were acquired by flow cytometry using an LSR III (BD Biosciences) and analyzed using FlowJo™ software (BD Bioscience). Since internalization of phosphatidylserine-attached beads by BMDMs would shield them from annexin V labeling, cells which had acquired a green bead fluorescence signal, but were still annexin V negative, were defined as having internalized beads.

### ***Immunoblot analysis***

For immunoblot analysis,  $5 \times 10^5$  BMDMs were lysed in RIPA buffer (50 mM Tris-HCl, 150 mM NaCl, 0.5 % (v:v) NP40, 1 % (v:v) Triton™ X-100, 5 mM EGTA, 5 mM EDTA, 1x cOmplete™ protease inhibitor cocktail) for 15 min on ice with regular pipetting. Proteins were separated by SDS-PAGE (BioRad) on a 12 % polyacrylamide gel, followed by a semi-dry transfer onto a PVDF membrane (Millipore). Nonspecific binding sites were blocked with Tris-buffered saline (TBS) containing 5 % BSA and 0.1 % (v:v) Tween-20. The membrane was incubated with antibodies against pan-talin (1:1000, Sigma-Aldrich) or actin (1:2000, Sigma-Aldrich) in 0.1 % Tween-20 and 5 % BSA overnight at 4 °C on a shaker. After three washes for 15 min in 0.7 % Tween-20 in PBS, the membrane was incubated in secondary antibody solutions (TBS containing 0.1 % Tween-20 and 5 % BSA, HRP-conjugated secondary antibodies (1:5000, Dako)) at room temperature. Protein bands were visualized with Clarity Western ECL substrate (BioRad), using a ChemiDoc™ Touch Gel Imaging System (BioRad).

### ***Mouse neutrophil preparation for efferocytosis assay***

Neutrophils were purified from freshly isolated mouse bone marrow cell suspensions using an autoMACS pro-selector cell separator with a MACS neutrophil isolation kit for negative selection in accordance with the manufacturer's instructions (Miltenyi Biotec). Neutrophils were aged overnight in serum-free medium at  $3 \times 10^6$  cells/ml at 37 °C and 5 % CO<sub>2</sub>. Aged neutrophils were stained prior to use in the 3D efferocytosis assay with 1 ml of 10 µg/ml

pHrodo™ Red SE in HBSS per  $2 \times 10^6$  cells for 45 min at 37 °C. Cells were then washed twice with RPMI.

### ***Random migration, efferocytosis and bead uptake in 3D matrigel***

For 3D random migration, efferocytosis and bead uptake assays, BMDMs were seeded at a concentration of  $2.4 \times 10^5$  cells/ml in 40 % Matrigel™ supplemented with 20 ng/ml M-CSF in a 96-well Incucyte™ image lock plate on ice under sterile conditions. When required, inhibitors were added to the final Matrigel™ at given concentrations (30  $\mu$ M Y27632 or 2  $\mu$ M Cytochalasin D). For 3D efferocytosis and bead uptake assays, aged fluorescent neutrophils or 3  $\mu$ m sized phosphatidylserine-attached fluorescent beads (Echelon Biosciences) were added to the final Matrigel™ cell suspension at  $4 \times 10^5$  neutrophils or  $2\text{--}2.4 \times 10^5$  beads per ml, respectively. After seeding, plates were centrifuged for 3 min at  $75 \times g$  and 4 °C and immediately transferred to a 37 °C cell incubator for 30 min. Samples were then left at room temperature for 10 min before 200  $\mu$ l of macrophage medium, with or without the addition of inhibitors, were added on top of the Matrigel™. Assays were acquired using an Incucyte™ S3 live-cell analysis system (Sartorius). Each well was imaged in 15 min intervals for 24–30 h with the image lock module and the 20 $\times$  objective. Fluorescent signals were acquired with the inbuilt dual color module 4614, with the visualization of phosphatidylserine-attached fluorescent beads in the green imaging channel or pHrodo™ Red SE labeled neutrophils in the red imaging channel. For cell morphology visualization during random migration, Lifeact-GFP expressing BMDMs were additionally acquired by fluorescent confocal microscopy after 24 h in the gel. Here,  $5 \times 10^5$  macrophages/ml in 20 ng/ml M-CSF-supplemented 40% Matrigel™ were seeded in  $\mu$  angiogenesis slides™ (Ibidi). Image acquisition was performed on a LSM 780 microscope (Zeiss), fitted with a Plan-Apochromat 40 $\times$ /1.4 Oil DIC M27 objective.

### ***Macrophage chemotaxis in 3D matrigel***

Ibidi  $\mu$  chemotaxis slides™ were used for 3D chemotaxis assays. 10  $\mu$ L of Matrigel™ macrophage suspensions (40 % phenol red free growth factor reduced Matrigel™, macrophages at  $3 \times 10^6$  cells/ml and 20 ng/ml M-CSF) with or without inhibitors (30  $\mu$ M Y27632 or 2  $\mu$ M Cytochalasin D) were added to each center port of the chemotaxis slide. The slide was then left to rest at room temperature for 7 min, followed by an incubation of 7 min at 37 °C and 5 % CO<sub>2</sub>. The slide was finally left to settle for 5 min at room temperature. Peripheral ports on each side of the Matrigel™ were filled with 65  $\mu$ L macrophage medium with or without the before mentioned inhibitors. The slides were incubated for 1 h at 37 °C and 5 % CO<sub>2</sub>. A C5a gradient was subsequently generated by adding 15  $\mu$ l macrophage medium (with or without inhibitors) containing 60 nM C5a to both ports on one side of the

Matrigel™. On the opposite side, 15 µL macrophage medium were added to both ports (with or without inhibitors). The slide was then loaded into the Incucyte™ S3 live-cell analysis system (Sartorius) using a custom-made slide mount and cells were imaged using the spheroid module in 15 min intervals for 24–30 h with the 20× objective.

### ***Tissue processing and immunofluorescence staining***

Organs (spleen, liver, lymph nodes) were harvested and placed in 1 % PFA at 4 °C overnight. After incubation in a 30 % sucrose solution for 8 h, organs were embedded in molds with Tissue Tek™ and stored at -20 °C. A Leica™ CM3050 S Cryostat was used to cut tissue into 20 µm thin tissue sections, which were mounted on Superfrost™ glass slides and stored at -20 °C until further processing. For immunofluorescence stainings, samples were blocked in blocking/staining solution (0.1 % Triton™ X-100, 1 % BSA in PBS) for 2 h at room temperature. The blocking buffer was removed and the tissue was stained overnight with primary antibodies in staining solution in a humidified chamber at 4 °C. Slides were washed three times with PBS before being incubated for 4 h in a humidified chamber with the secondary antibodies in staining solution. After staining, the slides were washed a further three times in PBS and mounted with a coverglass using Fluoromount-G (SouthernBiotech). Liver and spleen sections were stained with anti-collagen IV (1:500, abcam), anti-rabbit Alexa Fluor 405 (1:200, Thermo Fisher Scientific) and PE-conjugated anti-F4/80 (1:100, Thermo Fisher Scientific) antibodies. In addition to staining with anti-collagen IV (1:500, abcam) and anti-rabbit Alexa Fluor 405 (1:200, Thermo Fisher Scientific) antibodies, the endogenous GFP expression of lymph node sections from *Lyz2<sup>GFP/+</sup>* containing mice were amplified using an anti-GFP Dylight™ 488 antibody (1:750, Rockland). TUNEL stainings of lymph node sections were carried out using the Click-iT™ Plus TUNEL assay kit (Invitrogen). Tissue sections were treated with 2 % H<sub>2</sub>O<sub>2</sub> in methanol for 20 min at room temperature, followed by 2 washes in PBS. Samples were permeabilized with 0.01 % Triton™ X-100, 0.1 % sodium citrate in deionized water. The tissue was then rinsed with deionized water and incubated for 10 min with terminal deoxynucleotidyl transferase (TdT) buffer at 37 °C. The TdT buffer was replaced with the TdT reaction mix and samples were incubated for 60 min at 37 °C. Tissue sections were rinsed again with deionized water and treated with 0.1 % Triton™ X-100, 3 % BSA in PBS for 5 min. Subsequently, samples were rinsed once with PBS and incubated with the TUNEL reaction cocktail for 30 min at 37 °C. Finally, the tissue sections were washed once with 3 % BSA in PBS followed by one rinse with PBS. Antibody staining was then performed on the tissue sections as mentioned above. Antibodies used were: anti-LYVE1 (1:200, Abcam), anti-CD68 (1:200, BioLegend), anti-B220 (1:200 BD Horizon), anti-GFP Dylight™ 488 (1:500, Rockland), anti-collagen IV (1:500, Abcam), anti-rabbit Alexa Fluor 405 (1:300, Thermo Fisher Scientific) and anti-F4/80 (1:100, Invitrogen).

Images were acquired using an LSM 780 microscope (Zeiss) equipped with a Plan-Apochromat 20× M27 objective (Zeiss) or a Plan-Apochromat 40×/1.4 Oil DIC M27 objective.

### ***Imaging analysis***

Tracking analysis was performed with the manual tracking function of Imaris 9.5.1 to 9.7.1 (Bitplane). For the random 3D migration assays, viable cells in a randomly chosen region were manually tracked on a frame-by-frame basis. Cells that underwent cell division during the imaging period were excluded. For the 3D chemotaxis assays, BMDMs on the side of the gel facing the C5a gradient were tracked. In rare cases, biological replicates were excluded from analysis when macrophages did not respond to the attractant and only very few control cells performed directed migration. Track visualizations for random migration were generated using the Imaris spot module. Visualizations of macrophage chemotaxis tracks were generated by exporting track coordinates from Imaris and by importing them into the Ividi chemotaxis and migration tool software. Static tissue images were visualized using the Imaris volume and surface features. Cell circularity was manually measured using ImageJ/Fiji and the freehand selection tool, drawing the outline of the cell for every frame. Macrophage scanning and area coverage was visualized by creating binary masks for each frame of the phase contrast channel using the ImageJ MorphoLibJ plugin. Binary images of all time points were combined using the Time-Lapse Color Coder plugin. The time projection image was then merged with the phase contrast and green fluorescence (beads) channel. The spot function of Imaris was used to generate spots for all green events. All spots that resided within macrophages (as defined by the phase contrast channel) were manually removed, so that only extracellular (non-cleared beads) were visualized. For the 2P-IVM analysis of the dermal macrophage chemotactic response, cell bodies of dermal macrophages were manually tracked over 90 minutes. Cell protrusions were tracked from the onset of protrusion formation until protrusions reached their maximum extension. All protrusions from all biological replicates were tracked and the results statistically analysed. Bead uptake and neutrophil efferocytosis analysis was performed with the in-built analysis software of the Incucyte S3 instrument. Optimal parameters were manually defined for an analysis batch. Following this, a mask of the fluorescent signal was generated for all wells and time points. Within these masks, object counts and fluorescence intensity were analyzed. For the neutrophil efferocytosis assays, the Incucyte analysis results were further validated using an Imaris spot function analysis. Here, start and endpoint neutrophil fluorescence signals were used to generate spots for each neutrophil, which were then manually assigned as being either inside or outside of a macrophage. Using these designations the percentage removal of neutrophils was calculated. Cell protrusiveness was analyzed using a modified timeseries-based Sholl analysis and performed by tracking 10 random cells per condition.

This entailed overlaying each cells center points with a bullseye containing concentric rings (Sholl shells) at 25  $\mu\text{m}$  intervals. The number of occasions a Sholl shell was intersected by a cellular process was counted for all 15 min time intervals in a 24 h timeframe. This type of analysis was able to capture both multiple branch-based and elongation-based protrusiveness (Figure S5C). The TUNEL assay analysis was performed with ImageJ. T cell zones (B220-, and LYVE1-negative regions) were marked as regions of interest (ROI). The number of TUNEL-positive events in the ROI, which did not overlap with a CD68<sup>+</sup> macrophage stain, was quantified using the multi-point counter on a z-projection.

### ***Two-photon intravital microscopy of macrophage chemotaxis***

2P-IVM of directed macrophage migration toward a sterile laser-induced wound injury was performed in the absence of neutrophils. To avoid any contribution of neutrophils to this response, neutrophils were depleted by one intraperitoneal injection with 200  $\mu\text{g}$  of anti-Ly6G antibody diluted in PBS the day before imaging. Macrophage populations were visualized by GFP fluorescence in *Vav-iCre Itgb1<sup>fl/fl</sup> Lyz2<sup>GFP/+</sup>* and WT *Lyz2<sup>GFP/+</sup>* mice. For the experiment mice were anesthetized using isoflurane (cp-pharma; the isoflurane was vaporized in an oxygen-air mixture; 2 % isoflurane was used for induction and 1–1.5 % was used for maintenance). The anesthetized mouse was placed in a lateral recumbent position on a custom-made imaging platform, so that the ventral side of the ear pinna rested on a coverslip. The ear was immobilized with a strip of Hansaplast tape, which was lightly stretched over the ear and the imaging platform. 2P-IVM was performed using a LSM 780 NLO microscope (Zeiss) enclosed in a custom-built environmental chamber that was maintained at 32°C using heated air (Kienle et al., 2021). Anesthetized mice were kept in the heated environmental chamber for 15 to 30 min until the ear tissue had settled. Once the tissue was stable, a focal skin injury was induced by a focused 2P laser pulse at an approximate laser intensity of 80 mW. A circular region of interest of 15–30  $\mu\text{m}$  in diameter was defined in one focal plane of the collagenous ear dermis, followed by laser scanning at 920 nm wavelength until tissue coagulation started within 1–3 seconds. Image acquisition was started immediately after laser-induced tissue damage. A water immersion C-Apochromat 40 $\times$ /1.2 with corrector M27 objective was used for image acquisition. The microscope system was fitted with four external non-descanned photomultiplier tube detectors in the reflected light path. Fluorescence excitation was provided by an Insight<sup>®</sup> Ds+<sup>TM</sup> (Spectra Physics) tuned to 920 nm for GFP excitation and the generation of collagen second harmonic signal. Non-descanned detectors collected the emitted light. Images were mainly captured towards the anterior half of the ear pinna where hair follicles are sparse. For four-dimensional data sets, three-dimensional stacks were captured every 1 min. Raw imaging data were processed with Imaris software version 9.1.2 (Bitplane). All movies are



displayed as two-dimensional maximum-intensity projections of 10–15  $\mu\text{m}$  thick z-stacks. As the laser ablation turns the circular injured tissue autofluorescent in several channels, we masked the GFP autofluorescence of this region with Imaris-based image processing for data presentation.

### **Statistics**

Sample size was determined prior to experiment for all experiments used for hypothesis testing (i.e. data that include statistical inference). Technical replicates of one biological replicate were designated with “N”, biological replicates were designated with “n”. Sample sizes for technical replicates (i.e. the tracking of randomly chosen migrating cells) in one biological replicate were considered based on the mean and standard deviation of WT macrophage speed during migration. We defined a 30% reduction of mean speed at a power of 0.95 as biologically meaningful effect, determining a sample size of  $N=25$ . Reproducibility of the experimental findings was verified using biological replicates, which were performed as independent experiments. Experimental groups were defined by inhibitor treatment or by the genotype. Sample sizes for biological replicates in cell culture experiments (i.e. BMDM cultures generated from different individual mice) aimed for a minimum of mouse donors to reduce the number of laboratory animals. Sample size for animal experimentation was determined according to animal welfare guidelines. Blinding was not relevant for experiments with genotyping groups because all experimental groups were treated the same. Unpaired two-tailed t tests and analysis of variance (ANOVA) were performed after data were confirmed to fulfill the criteria of normal distribution, otherwise two-tailed Mann–Whitney U tests or Kruskal–Wallis tests were applied. The D’Agostino & Pearson normality test was performed for group sizes over ten, for group sizes under ten the Shapiro–Wilk normality test was performed. If overall ANOVA or Kruskal–Wallis tests were significant, we performed post hoc test with pair-wise comparisons (ANOVA: Dunnett, Kruskal–Wallis: Dunn). Analyses were performed with GraphPad Prism-software (Version 8.3.1). Asterisks indicate significance ( $*P \leq 0.05$ ,  $**P \leq 0.01$ ,  $***P \leq 0.001$ ). NS indicates non-significant difference ( $P > 0.05$ ). For further statistical details, see Supplementary Table 1.

### **Acknowledgements**

We thank K. Ganter for technical assistance and A. Rambold, J. Zimmermann and K. Glaser for critically reading the manuscript. We thank R. Fässler, C. Brakebusch, R. Wedlich-Söldner, S. Monkley, D. Critchley, M. Sixt and T. Graf for providing mouse lines for this study. This work was funded by the Deutsche Forschungsgemeinschaft (DFG, German Research Foundation), Project-IDs 259373024 (CRC/TRR 167) and 89986987 (SFB 850), and by the Max Planck Society.

### **Author contribution**

N.P.: Conceptualization; Investigation; Methodology; Formal analysis; Validation; Visualization; Writing - review and editing. T.L.: Conceptualization, Funding acquisition, Project administration, Supervision, Investigation, Formal analysis, Methodology, Visualization, Writing - original draft, Writing – review and editing.

### **Declaration of Interests**

The authors declare no competing financial or non-financial interests.

## References

- Arasa, J., Collado-Diaz, V., Kritikos, I., Medina-Sanchez, J. D., Friess, M. C., Sigmund, E. C., Schineis, P., Hunter, M. C., Tacconi, C., Paterson, N., Nagasawa, T., Kiefer, F., Makinen, T., Detmar, M., Moser, M., Lammermann, T., & Halin, C. (2021, Jul 5). Upregulation of VCAM-1 in lymphatic collectors supports dendritic cell entry and rapid migration to lymph nodes in inflammation. *J Exp Med*, *218*(7). <https://doi.org/10.1084/jem.20201413>
- Baratin, M., Simon, L., Jorquera, A., Ghigo, C., Dembele, D., Nowak, J., Gentek, R., Wienert, S., Klauschen, F., Malissen, B., Dalod, M., & Bajenoff, M. (2017, Aug 15). T Cell Zone Resident Macrophages Silently Dispose of Apoptotic Cells in the Lymph Node. *Immunity*, *47*(2), 349-362 e345. <https://doi.org/10.1016/j.immuni.2017.07.019>
- Barros-Becker, F., Lam, P. Y., Fisher, R., & Huttenlocher, A. (2017, Nov 15). Live imaging reveals distinct modes of neutrophil and macrophage migration within interstitial tissues. *J Cell Sci*, *130*(22), 3801-3808. <https://doi.org/10.1242/jcs.206128>
- Bellomo, A., Gentek, R., Bajenoff, M., & Baratin, M. (2018, Aug). Lymph node macrophages: Scavengers, immune sentinels and trophic effectors. *Cell Immunol*, *330*, 168-174. <https://doi.org/10.1016/j.cellimm.2018.01.010>
- Bleriot, C., Chakarov, S., & Ginhoux, F. (2020, Jun 16). Determinants of Resident Tissue Macrophage Identity and Function. *Immunity*, *52*(6), 957-970. <https://doi.org/10.1016/j.immuni.2020.05.014>
- Bodor, D. L., Ponisch, W., Endres, R. G., & Paluch, E. K. (2020, Mar 9). Of Cell Shapes and Motion: The Physical Basis of Animal Cell Migration. *Dev Cell*, *52*(5), 550-562. <https://doi.org/10.1016/j.devcel.2020.02.013>
- Brand, A., Diener, N., Zahner, S. P., Tripp, C., Backer, R. A., Karram, K., Jiang, A., Mellman, I., Stoitzner, P., & Clausen, B. E. (2020, Jan). E-Cadherin is Dispensable to Maintain Langerhans Cells in the Epidermis. *J Invest Dermatol*, *140*(1), 132-142 e133. <https://doi.org/10.1016/j.jid.2019.06.132>
- Calderwood, D. A., & Ginsberg, M. H. (2003, Aug). Talin forges the links between integrins and actin. *Nat Cell Biol*, *5*(8), 694-697. <https://doi.org/10.1038/ncb0803-694>
- Comber, K., Huelsmann, S., Evans, I., Sanchez-Sanchez, B. J., Chalmers, A., Reuter, R., Wood, W., & Martin-Bermudo, M. D. (2013, Aug 1). A dual role for the betaPS integrin myospheroid in mediating Drosophila embryonic macrophage migration. *J Cell Sci*, *126*(Pt 15), 3475-3484. <https://doi.org/10.1242/jcs.129700>
- Cox, N., Pokrovskii, M., Vicario, R., & Geissmann, F. (2021, Apr 26). Origins, Biology, and Diseases of Tissue Macrophages. *Annu Rev Immunol*, *39*, 313-344. <https://doi.org/10.1146/annurev-immunol-093019-111748>
- Cui, K., Ardell, C. L., Podolnikova, N. P., & Yakubenko, V. P. (2018). Distinct Migratory Properties of M1, M2, and Resident Macrophages Are Regulated by alphaDbeta2 and alphaMbeta2 Integrin-Mediated Adhesion. *Front Immunol*, *9*, 2650. <https://doi.org/10.3389/fimmu.2018.02650>
- Damisah, E. C., Hill, R. A., Rai, A., Chen, F., Rothlin, C. V., Ghosh, S., & Grutzendler, J. (2020, Jun). Astrocytes and microglia play orchestrated roles and respect phagocytic

- territories during neuronal corpse removal in vivo. *Sci Adv*, 6(26), eaba3239. <https://doi.org/10.1126/sciadv.aba3239>
- Davidson, A. J., & Wood, W. (2020a, May 26). Macrophages Use Distinct Actin Regulators to Switch Engulfment Strategies and Ensure Phagocytic Plasticity In Vivo. *Cell Rep*, 31(8), 107692. <https://doi.org/10.1016/j.celrep.2020.107692>
- Davidson, A. J., & Wood, W. (2020b, Apr 1). Phagocyte Responses to Cell Death in Flies. *Cold Spring Harb Perspect Biol*, 12(4). <https://doi.org/10.1101/cshperspect.a036350>
- Dawson, C. A., Pal, B., Vaillant, F., Gandolfo, L. C., Liu, Z., Bleriot, C., Ginhoux, F., Smyth, G. K., Lindeman, G. J., Mueller, S. N., Rios, A. C., & Visvader, J. E. (2020, May). Tissue-resident ductal macrophages survey the mammary epithelium and facilitate tissue remodelling. *Nat Cell Biol*, 22(5), 546-558. <https://doi.org/10.1038/s41556-020-0505-0>
- de Boer, J., Williams, A., Skavdis, G., Harker, N., Coles, M., Tolaini, M., Norton, T., Williams, K., Roderick, K., Potocnik, A. J., & Kioussis, D. (2003, Feb). Transgenic mice with hematopoietic and lymphoid specific expression of Cre. *Eur J Immunol*, 33(2), 314-325. <https://doi.org/10.1002/immu.200310005>
- Elliott, M. R., & Ravichandran, K. S. (2016, Jul 25). The Dynamics of Apoptotic Cell Clearance. *Dev Cell*, 38(2), 147-160. <https://doi.org/10.1016/j.devcel.2016.06.029>
- Faust, N., Varas, F., Kelly, L. M., Heck, S., & Graf, T. (2000, Jul 15). Insertion of enhanced green fluorescent protein into the lysozyme gene creates mice with green fluorescent granulocytes and macrophages. *Blood*, 96(2), 719-726. <https://www.ncbi.nlm.nih.gov/pubmed/10887140>
- Freitas-Lopes, M. A., Mafra, K., David, B. A., Carvalho-Gontijo, R., & Menezes, G. B. (2017, Dec 7). Differential Location and Distribution of Hepatic Immune Cells. *Cells*, 6(4). <https://doi.org/10.3390/cells6040048>
- Gawden-Bone, C., West, M. A., Morrison, V. L., Edgar, A. J., McMillan, S. J., Dill, B. D., Trost, M., Prescott, A., Fagerholm, S. C., & Watts, C. (2014, Oct 01). A crucial role for beta2 integrins in podosome formation, dynamics and Toll-like-receptor-signaled disassembly in dendritic cells. *J Cell Sci*, 127(Pt 19), 4213-4224. <https://doi.org/10.1242/jcs.151167>
- Gordon, S., Pluddemann, A., & Mukhopadhyay, S. (2014, Dec 11). Sinusoidal immunity: macrophages at the lymphohematopoietic interface. *Cold Spring Harb Perspect Biol*, 7(4), a016378. <https://doi.org/10.1101/cshperspect.a016378>
- Han, C. Z., Juncadella, I. J., Kinchen, J. M., Buckley, M. W., Klibanov, A. L., Dryden, K., Onengut-Gumuscu, S., Erdbrugger, U., Turner, S. D., Shim, Y. M., Tung, K. S., & Ravichandran, K. S. (2016, Nov 24). Macrophages redirect phagocytosis by non-professional phagocytes and influence inflammation. *Nature*, 539(7630), 570-574. <https://doi.org/10.1038/nature20141>
- Honda, M., Surewaard, B. G. J., Watanabe, M., Hedrick, C. C., Lee, W. Y., Brown, K., McCoy, K. D., & Kubes, P. (2020, Mar 12). Perivascular localization of macrophages in the intestinal mucosa is regulated by Nr4a1 and the microbiome. *Nat Commun*, 11(1), 1329. <https://doi.org/10.1038/s41467-020-15068-4>

- Hughes, L. D., Wang, Y., Meli, A. P., Rothlin, C. V., & Ghosh, S. (2021, Apr 26). Decoding Cell Death: From a Veritable Library of Babel to Vade Mecum? *Annu Rev Immunol*, 39, 791-817. <https://doi.org/10.1146/annurev-immunol-102819-072601>
- Hynes, R. O. (2002, Sep 20). Integrins: bidirectional, allosteric signaling machines. *Cell*, 110(6), 673-687. [https://doi.org/10.1016/s0092-8674\(02\)00971-6](https://doi.org/10.1016/s0092-8674(02)00971-6)
- Jain, R., & Weninger, W. (2013, Apr). Shedding light on cutaneous innate immune responses: the intravital microscopy approach. *Immunol Cell Biol*, 91(4), 263-270. <https://doi.org/10.1038/icb.2012.76>
- Jaumouille, V., Cartagena-Rivera, A. X., & Waterman, C. M. (2019, Nov). Coupling of beta2 integrins to actin by a mechanosensitive molecular clutch drives complement receptor-mediated phagocytosis. *Nat Cell Biol*, 21(11), 1357-1369. <https://doi.org/10.1038/s41556-019-0414-2>
- Kelly, A., Gunaltay, S., McEntee, C. P., Shuttleworth, E. E., Smedley, C., Houston, S. A., Fenton, T. M., Levison, S., Mann, E. R., & Travis, M. A. (2018, Nov 5). Human monocytes and macrophages regulate immune tolerance via integrin alphavbeta8-mediated TGFbeta activation. *J Exp Med*, 215(11), 2725-2736. <https://doi.org/10.1084/jem.20171491>
- Kienle, K., Glaser, K. M., Eickhoff, S., Mihlan, M., Knopper, K., Reategui, E., Epple, M. W., Gunzer, M., Baumeister, R., Tarrant, T. K., Germain, R. N., Irimia, D., Kastenmuller, W., & Lammermann, T. (2021, Jun 18). Neutrophils self-limit swarming to contain bacterial growth in vivo. *Science*, 372(6548). <https://doi.org/10.1126/science.abe7729>
- Lämmermann, T., Afonso, P. V., Angermann, B. R., Wang, J. M., Kastenmuller, W., Parent, C. A., & Germain, R. N. (2013, Jun 20). Neutrophil swarms require LTB4 and integrins at sites of cell death in vivo. *Nature*, 498(7454), 371-375. <https://doi.org/10.1038/nature12175>
- Lämmermann, T., Bader, B. L., Monkley, S. J., Worbs, T., Wedlich-Soldner, R., Hirsch, K., Keller, M., Forster, R., Critchley, D. R., Fassler, R., & Sixt, M. (2008, May 1). Rapid leukocyte migration by integrin-independent flowing and squeezing. *Nature*, 453(7191), 51-55. <https://doi.org/10.1038/nature06887>
- Lämmermann, T., & Germain, R. N. (2014, Mar). The multiple faces of leukocyte interstitial migration. *Semin Immunopathol*, 36(2), 227-251. <https://doi.org/10.1007/s00281-014-0418-8>
- Lämmermann, T., & Sixt, M. (2009, Oct). Mechanical modes of 'amoeboid' cell migration. *Curr Opin Cell Biol*, 21(5), 636-644. <https://doi.org/10.1016/j.ceb.2009.05.003>
- Lemke, G. (2019, Sep). How macrophages deal with death. *Nat Rev Immunol*, 19(9), 539-549. <https://doi.org/10.1038/s41577-019-0167-y>
- Ley, K., Pramod, A. B., Croft, M., Ravichandran, K. S., & Ting, J. P. (2016). How Mouse Macrophages Sense What Is Going On. *Front Immunol*, 7, 204. <https://doi.org/10.3389/fimmu.2016.00204>
- Matsubayashi, Y., Louani, A., Dragu, A., Sanchez-Sanchez, B. J., Serna-Morales, E., Yolland, L., Gyoergy, A., Vizcay, G., Fleck, R. A., Heddleston, J. M., Chew, T. L., Siekhaus, D. E., & Stramer, B. M. (2017, Nov 20). A Moving Source of Matrix

- Components Is Essential for De Novo Basement Membrane Formation. *Curr Biol*, 27(22), 3526-3534 e3524. <https://doi.org/10.1016/j.cub.2017.10.001>
- Meller, J., Chen, Z., Dudiki, T., Cull, R. M., Murtazina, R., Bal, S. K., Pluskota, E., Stefl, S., Plow, E. F., Trapp, B. D., & Byzova, T. V. (2017, Jun 2). Integrin-Kindlin3 requirements for microglial motility in vivo are distinct from those for macrophages. *JCI Insight*, 2(11). <https://doi.org/10.1172/jci.insight.93002>
- Moreira, C. G., Jacinto, A., & Prag, S. (2013, Aug 15). Drosophila integrin adhesion complexes are essential for hemocyte migration in vivo. *Biol Open*, 2(8), 795-801. <https://doi.org/10.1242/bio.20134564>
- Mylvaganam, S., Freeman, S. A., & Grinstein, S. (2021, May 24). The cytoskeleton in phagocytosis and macropinocytosis. *Curr Biol*, 31(10), R619-R632. <https://doi.org/10.1016/j.cub.2021.01.036>
- Neupane, A. S., Willson, M., Chojnacki, A. K., Vargas, E. S. C. F., Morehouse, C., Carestia, A., Keller, A. E., Peiseler, M., DiGiandomenico, A., Kelly, M. M., Amrein, M., Jenne, C., Thanabalasuriar, A., & Kubes, P. (2020, Oct 1). Patrolling Alveolar Macrophages Conceal Bacteria from the Immune System to Maintain Homeostasis. *Cell*, 183(1), 110-125 e111. <https://doi.org/10.1016/j.cell.2020.08.020>
- Nicolas-Avila, J. A., Lechuga-Vieco, A. V., Esteban-Martinez, L., Sanchez-Diaz, M., Diaz-Garcia, E., Santiago, D. J., Rubio-Ponce, A., Li, J. L., Balachander, A., Quintana, J. A., Martinez-de-Mena, R., Castejon-Vega, B., Pun-Garcia, A., Traves, P. G., Bonzon-Kulichenko, E., Garcia-Marques, F., Cusso, L., N, A. G., Gonzalez-Guerra, A., Roche-Molina, M., Martin-Salamanca, S., Crainiciuc, G., Guzman, G., Larrazabal, J., Herrero-Galan, E., Alegre-Cebollada, J., Lemke, G., Rothlin, C. V., Jimenez-Borreguero, L. J., Reyes, G., Castrillo, A., Desco, M., Munoz-Canoves, P., Ibanez, B., Torres, M., Ng, L. G., Priori, S. G., Bueno, H., Vazquez, J., Cordero, M. D., Bernal, J. A., Enriquez, J. A., & Hidalgo, A. (2020, Oct 1). A Network of Macrophages Supports Mitochondrial Homeostasis in the Heart. *Cell*, 183(1), 94-109 e123. <https://doi.org/10.1016/j.cell.2020.08.031>
- Nourshargh, S., Hordijk, P. L., & Sixt, M. (2010, May). Breaching multiple barriers: leukocyte motility through venular walls and the interstitium. *Nat Rev Mol Cell Biol*, 11(5), 366-378. <https://doi.org/10.1038/nrm2889>
- Okabe, Y., & Medzhitov, R. (2016, Jan). Tissue biology perspective on macrophages. *Nat Immunol*, 17(1), 9-17. <https://doi.org/10.1038/ni.3320>
- Owen, K. A., Pixley, F. J., Thomas, K. S., Vicente-Manzanares, M., Ray, B. J., Horwitz, A. F., Parsons, J. T., Beggs, H. E., Stanley, E. R., & Bouton, A. H. (2007, Dec 17). Regulation of lamellipodial persistence, adhesion turnover, and motility in macrophages by focal adhesion kinase. *J Cell Biol*, 179(6), 1275-1287. <https://doi.org/10.1083/jcb.200708093>
- Paluch, E. K., Aspalter, I. M., & Sixt, M. (2016, Oct 6). Focal Adhesion-Independent Cell Migration. *Annu Rev Cell Dev Biol*, 32, 469-490. <https://doi.org/10.1146/annurev-cellbio-111315-125341>
- Petrich, B. G., Marchese, P., Ruggeri, Z. M., Spiess, S., Weichert, R. A., Ye, F., Tiedt, R., Skoda, R. C., Monkley, S. J., Critchley, D. R., & Ginsberg, M. H. (2007, Dec 24). Talin is required for integrin-mediated platelet function in hemostasis and thrombosis. *J Exp Med*, 204(13), 3103-3111. <https://doi.org/10.1084/jem.20071800>

- Potocnik, A. J., Brakebusch, C., & Fassler, R. (2000, Jun). Fetal and adult hematopoietic stem cells require beta1 integrin function for colonizing fetal liver, spleen, and bone marrow. *Immunity*, 12(6), 653-663. [https://doi.org/10.1016/s1074-7613\(00\)80216-2](https://doi.org/10.1016/s1074-7613(00)80216-2)
- Reversat, A., Gaertner, F., Merrin, J., Stopp, J., Tasciyan, S., Aguilera, J., de Vries, I., Hauschild, R., Hons, M., Piel, M., Callan-Jones, A., Voituriez, R., & Sixt, M. (2020, Jun). Cellular locomotion using environmental topography. *Nature*, 582(7813), 582-585. <https://doi.org/10.1038/s41586-020-2283-z>
- Riedl, J., Flynn, K. C., Raducanu, A., Gartner, F., Beck, G., Bosl, M., Bradke, F., Massberg, S., Aszodi, A., Sixt, M., & Wedlich-Soldner, R. (2010, Mar). Lifeact mice for studying F-actin dynamics. *Nat Methods*, 7(3), 168-169. <https://doi.org/10.1038/nmeth0310-168>
- Rothlin, C. V., & Ghosh, S. (2020, May 1). Cracking the Cell Death Code. *Cold Spring Harb Perspect Biol*, 12(5). <https://doi.org/10.1101/cshperspect.a036343>
- Rothlin, C. V., Hille, T. D., & Ghosh, S. (2021, May). Determining the effector response to cell death. *Nat Rev Immunol*, 21(5), 292-304. <https://doi.org/10.1038/s41577-020-00456-0>
- Rueden, C. T., Schindelin, J., Hiner, M. C., DeZonia, B. E., Walter, A. E., Arena, E. T., & Eliceiri, K. W. (2017, Nov 29). ImageJ2: ImageJ for the next generation of scientific image data. *BMC Bioinformatics*, 18(1), 529. <https://doi.org/10.1186/s12859-017-1934-z>
- Sanchez-Sanchez, B. J., Urbano, J. M., Comber, K., Dragu, A., Wood, W., Stramer, B., & Martin-Bermudo, M. D. (2017, Nov 7). Drosophila Embryonic Hemocytes Produce Laminins to Strengthen Migratory Response. *Cell Rep*, 21(6), 1461-1470. <https://doi.org/10.1016/j.celrep.2017.10.047>
- Scharffetter-Kochanek, K., Lu, H., Norman, K., van Nood, N., Munoz, F., Grabbe, S., McArthur, M., Lorenzo, I., Kaplan, S., Ley, K., Smith, C. W., Montgomery, C. A., Rich, S., & Beaudet, A. L. (1998, Jul 6). Spontaneous skin ulceration and defective T cell function in CD18 null mice. *J Exp Med*, 188(1), 119-131. <https://doi.org/10.1084/jem.188.1.119>
- Schindelin, J., Arganda-Carreras, I., Frise, E., Kaynig, V., Longair, M., Pietzsch, T., Preibisch, S., Rueden, C., Saalfeld, S., Schmid, B., Tinevez, J. Y., White, D. J., Hartenstein, V., Eliceiri, K., Tomancak, P., & Cardona, A. (2012, Jun 28). Fiji: an open-source platform for biological-image analysis. *Nat Methods*, 9(7), 676-682. <https://doi.org/10.1038/nmeth.2019>
- Segawa, K., & Nagata, S. (2015, Nov). An Apoptotic 'Eat Me' Signal: Phosphatidylserine Exposure. *Trends Cell Biol*, 25(11), 639-650. <https://doi.org/10.1016/j.tcb.2015.08.003>
- Stolp, B., Thelen, F., Ficht, X., Altenburger, L. M., Ruef, N., Inavalli, V., Germann, P., Page, N., Moalli, F., Raimondi, A., Keyser, K. A., Seyed Jafari, S. M., Barone, F., Dettmer, M. S., Merkler, D., Iannacone, M., Sharpe, J., Schlapbach, C., Fackler, O. T., Nagerl, U. V., & Stein, J. V. (2020, Apr 3). Salivary gland macrophages and tissue-resident CD8(+) T cells cooperate for homeostatic organ surveillance. *Sci Immunol*, 5(46). <https://doi.org/10.1126/sciimmunol.aaz4371>

- Torres-Gomez, A., Cabanas, C., & Lafuente, E. M. (2020). Phagocytic Integrins: Activation and Signaling. *Front Immunol*, *11*, 738. <https://doi.org/10.3389/fimmu.2020.00738>
- Uderhardt, S., Martins, A. J., Tsang, J. S., Lämmermann, T., & Germain, R. N. (2019, Apr 18). Resident Macrophages Cloak Tissue Microlesions to Prevent Neutrophil-Driven Inflammatory Damage. *Cell*, *177*(3), 541-555 e517. <https://doi.org/10.1016/j.cell.2019.02.028>
- Van Goethem, E., Guiet, R., Balor, S., Charriere, G. M., Poincloux, R., Labrousse, A., Maridonneau-Parini, I., & Le Cabec, V. (2011, Feb-Mar). Macrophage podosomes go 3D. *Eur J Cell Biol*, *90*(2-3), 224-236. <https://doi.org/10.1016/j.ejcb.2010.07.011>
- Van Goethem, E., Poincloux, R., Gauffre, F., Maridonneau-Parini, I., & Le Cabec, V. (2010, Jan 15). Matrix architecture dictates three-dimensional migration modes of human macrophages: differential involvement of proteases and podosome-like structures. *J Immunol*, *184*(2), 1049-1061. <https://doi.org/10.4049/jimmunol.0902223>
- Vorselen, D., Labitigan, R. L. D., & Theriot, J. A. (2020, Oct). A mechanical perspective on phagocytic cup formation. *Curr Opin Cell Biol*, *66*, 112-122. <https://doi.org/10.1016/j.ceb.2020.05.011>
- Weischenfeldt, J., & Porse, B. (2008, Dec 1). Bone Marrow-Derived Macrophages (BMM): Isolation and Applications. *CSH Protoc*, *2008*, pdb prot5080. <https://doi.org/10.1101/pdb.prot5080>
- Wiesner, C., Le-Cabec, V., El Azzouzi, K., Maridonneau-Parini, I., & Linder, S. (2014). Podosomes in space: macrophage migration and matrix degradation in 2D and 3D settings. *Cell Adh Migr*, *8*(3), 179-191. <https://www.ncbi.nlm.nih.gov/pubmed/24713854>
- Wood, W., & Martin, P. (2017, Feb 6). Macrophage Functions in Tissue Patterning and Disease: New Insights from the Fly. *Dev Cell*, *40*(3), 221-233. <https://doi.org/10.1016/j.devcel.2017.01.001>
- Woolf, E., Grigorova, I., Sagiv, A., Grabovsky, V., Feigelson, S. W., Shulman, Z., Hartmann, T., Sixt, M., Cyster, J. G., & Alon, R. (2007, Oct). Lymph node chemokines promote sustained T lymphocyte motility without triggering stable integrin adhesiveness in the absence of shear forces. *Nat Immunol*, *8*(10), 1076-1085. <https://doi.org/10.1038/ni1499>
- Yakubenko, V. P., Lishko, V. K., Lam, S. C., & Ugarova, T. P. (2002, Dec 13). A molecular basis for integrin alphaMbeta 2 ligand binding promiscuity. *J Biol Chem*, *277*(50), 48635-48642. <https://doi.org/10.1074/jbc.M208877200>
- Yamada, K. M., & Sixt, M. (2019, Dec). Mechanisms of 3D cell migration. *Nat Rev Mol Cell Biol*, *20*(12), 738-752. <https://doi.org/10.1038/s41580-019-0172-9>
- Yona, S., Kim, K. W., Wolf, Y., Mildner, A., Varol, D., Breker, M., Strauss-Ayali, D., Viukov, S., Guillemins, M., Misharin, A., Hume, D. A., Perlman, H., Malissen, B., Zelzer, E., & Jung, S. (2013, Jan 24). Fate mapping reveals origins and dynamics of monocytes and tissue macrophages under homeostasis. *Immunity*, *38*(1), 79-91. <https://doi.org/10.1016/j.immuni.2012.12.001>



Zajd, C. M., Ziemba, A. M., Miralles, G. M., Nguyen, T., Feustel, P. J., Dunn, S. M., Gilbert, R. J., & Lennartz, M. R. (2020). Bone Marrow-Derived and Elicited Peritoneal Macrophages Are Not Created Equal: The Questions Asked Dictate the Cell Type Used. *Front Immunol*, 11, 269. <https://doi.org/10.3389/fimmu.2020.00269>

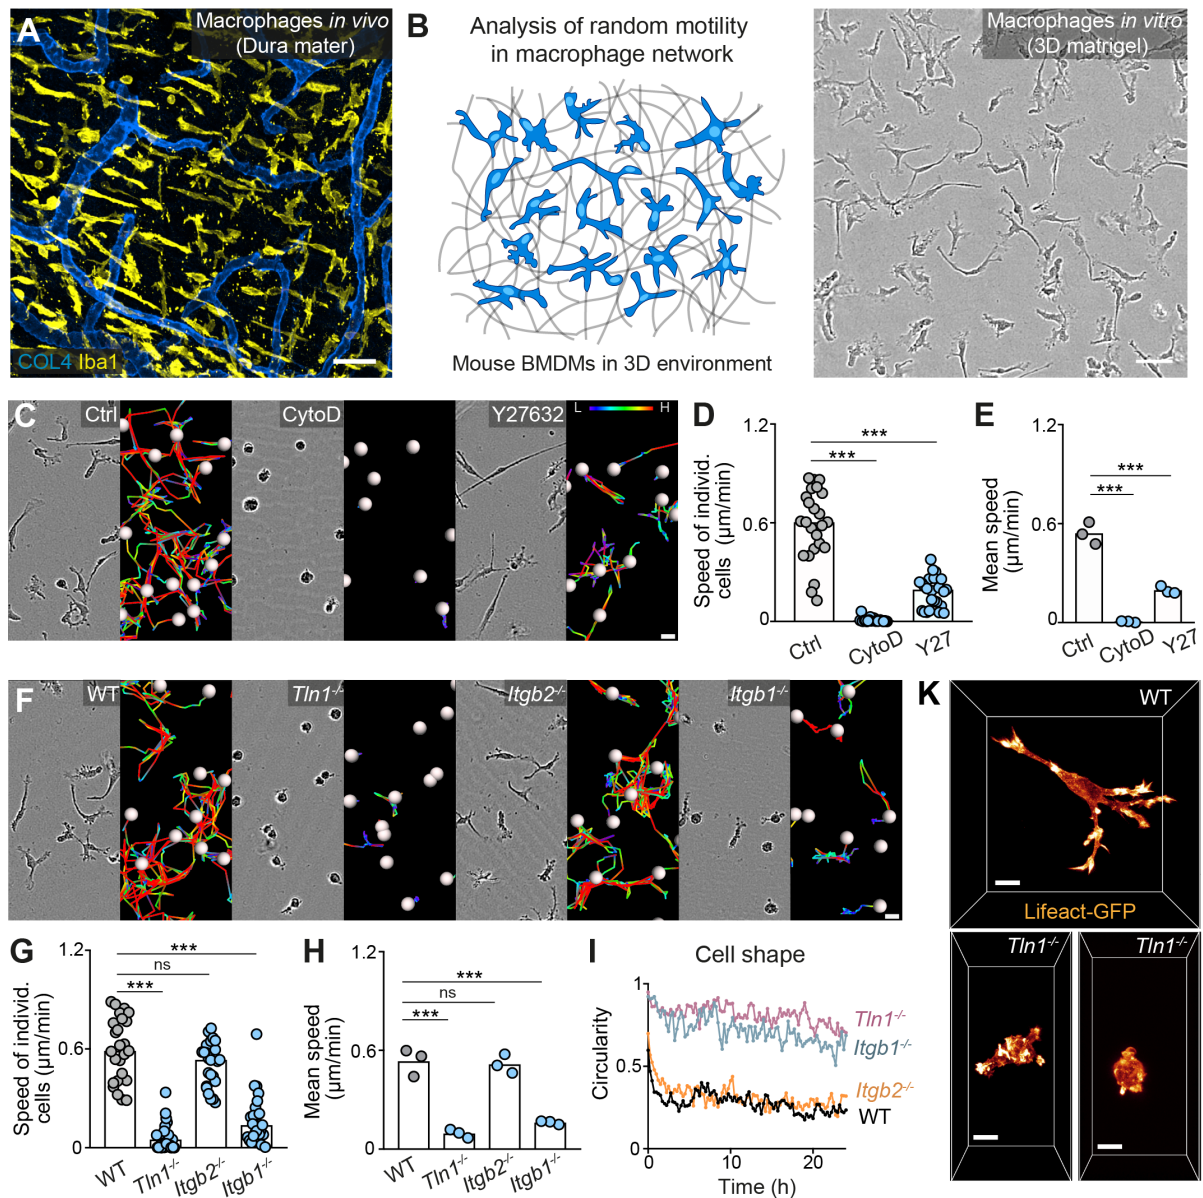

**Figure 1. Haptokinetic random motility of macrophages in 3D matrices.** (A) Representative macrophage network in adult mouse tissue. Immunofluorescence staining of a Dura mater whole mount preparation, showing macrophages (yellow) and blood vasculature (blue). COL4: collagen IV. (B) Scheme (left) and brightfield image (right) for studying macrophage network dynamics in 3D *in vitro* matrices. (C–E) Analysis of BMDM random motility in the presence of cytochalasin D (CytoD) or Y27632. (C) Representative cell morphologies (brightfield microscopy) and pseudo-colored tracks (displacement delta length: L(low)=0, H(high)=15) over 24 h. (D) Individual cell speeds from one independent experiment (dots represent randomly chosen cells per condition,  $N=25$ ), and (E) mean speed values calculated from three biological replicates ( $n=3$ ). (F–H) Analysis of BMDM random motility upon genetic interference with integrin functionality, including (F) cell morphologies and tracks over 24 h, (G) individual cell speeds from one independent experiment ( $N=25$ ), and (H) mean speed values calculated from three biological replicates ( $n=3$ ). (I) Graphical analysis of cell shape at 15-min time intervals over 24 h for integrin-mutant BMDMs. Dots are mean values of  $N=5$  randomly chosen cells per genotype. A circularity value of 1 equals a perfectly circular cell. (K) Confocal live cell microscopy of Lifeact-GFP expressing WT or  $Tln1^{-/-}$  BMDMs in 3D matrigel. Bars in graphs: median (D, G), mean (E, H). Statistical tests:  $***P \leq 0.001$ , Dunn's multiple comparison (posthoc Kruskal-Wallis test) (D, G);  $***P \leq 0.001$ , Dunnett's multiple comparison (posthoc ANOVA) (E, H). Scale bars: 50  $\mu\text{m}$  (A, B), 10  $\mu\text{m}$  (K), 20  $\mu\text{m}$  (C, F).

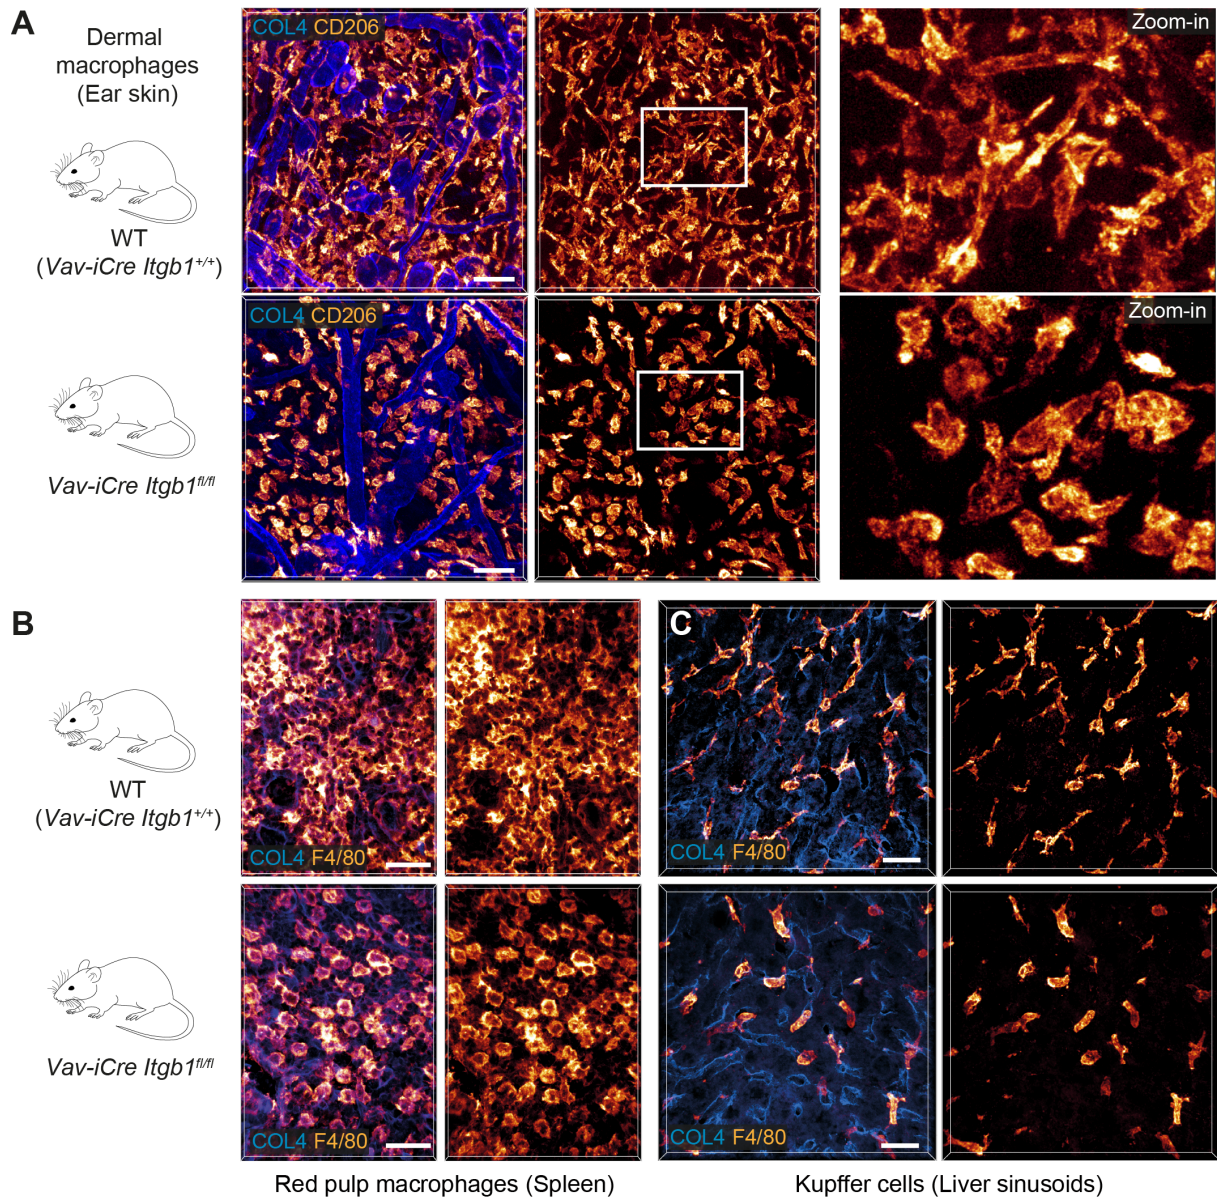

**Figure 2.  $\beta 1$  integrins define the mesenchymal shape of macrophages in mouse tissues. (A–C)** Comparative analysis of ear skin dermis (A), spleen (B) and liver (C) tissues of adult *Vav-iCre<sup>+/+</sup> Itgb1<sup>fl/fl</sup>* mice and littermate controls. Endogenous macrophage subsets were detected with immuno-stainings against CD206 (A) and F4/80 (B, C) and fluorescence signal intensities displayed as glow heatmap color. Collagen IV (COL4)-expressing basement membrane (A, C) or reticular network (B) structures are also displayed (blue). All images are projections of several confocal z-planes. Scale bars: 50  $\mu$ m (A), 30  $\mu$ m (B,C).

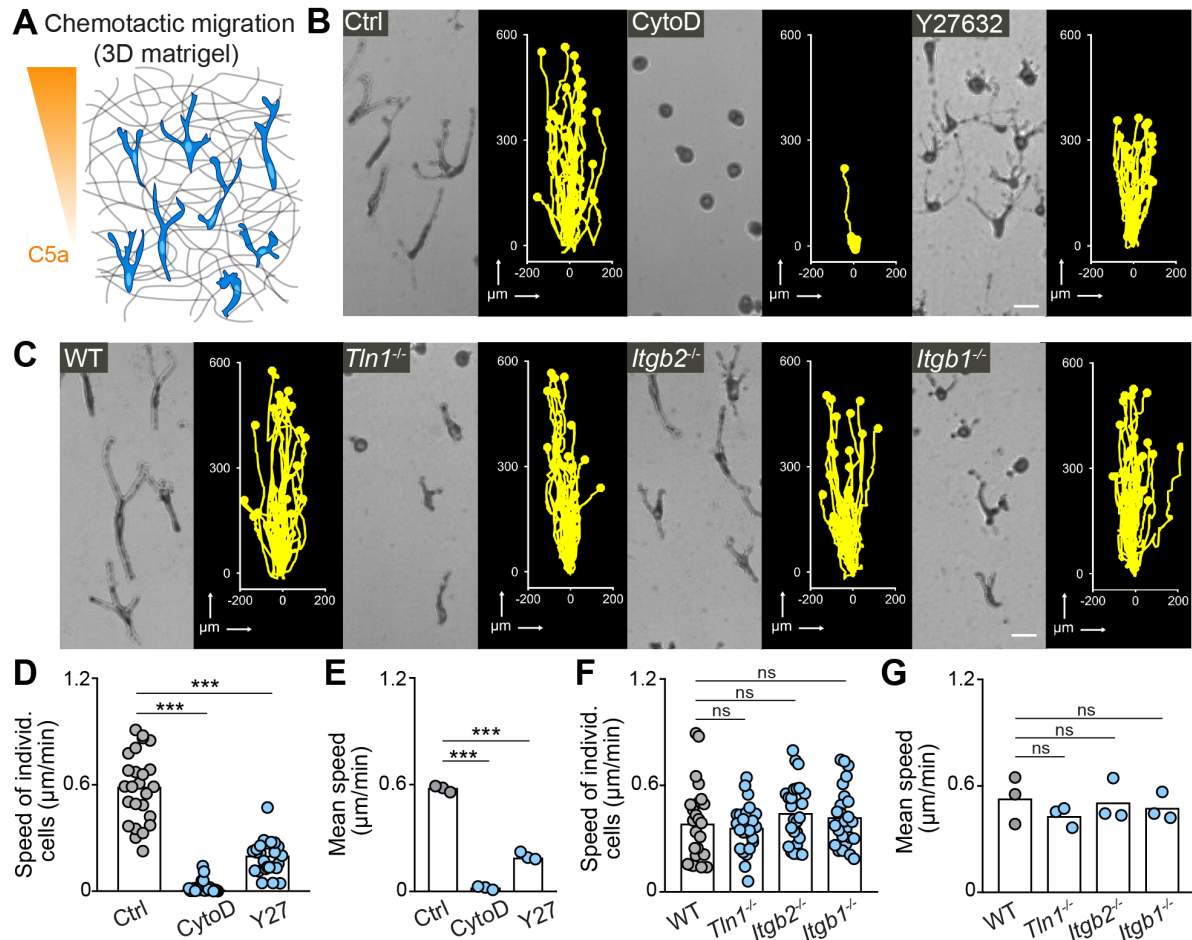

**Figure 3. Integrin-independent 3D macrophage movement during chemotactic responses.** (A) Scheme for studying chemotactic macrophage migration toward C5a gradients in 3D *in vitro* matrices. (B, C) Representative cell morphologies (brightfield microscopy) and tracks over 24 h of chemotaxing BMDMs (B) in the presence of cytochalasin D (CytoD) and Y27632, and (C) upon genetic interference with integrin functionality. Scale bars: 25  $\mu\text{m}$ . (D–G) Analysis of BMDM chemotactic migration, including (D,F) individual cell speeds from one independent experiment (dots represent randomly chosen cells per condition,  $N=25$ ), and (F,G) mean speed values of three biological replicates ( $n=3$ ). Bars in graphs: median (D–F), mean (E–G). Statistical tests:  $***P \leq 0.001$ , Dunn's multiple comparison (posthoc Kruskal-Wallis test) (D);  $***P \leq 0.001$ , Dunnett's multiple comparison (posthoc ANOVA) (E–G).

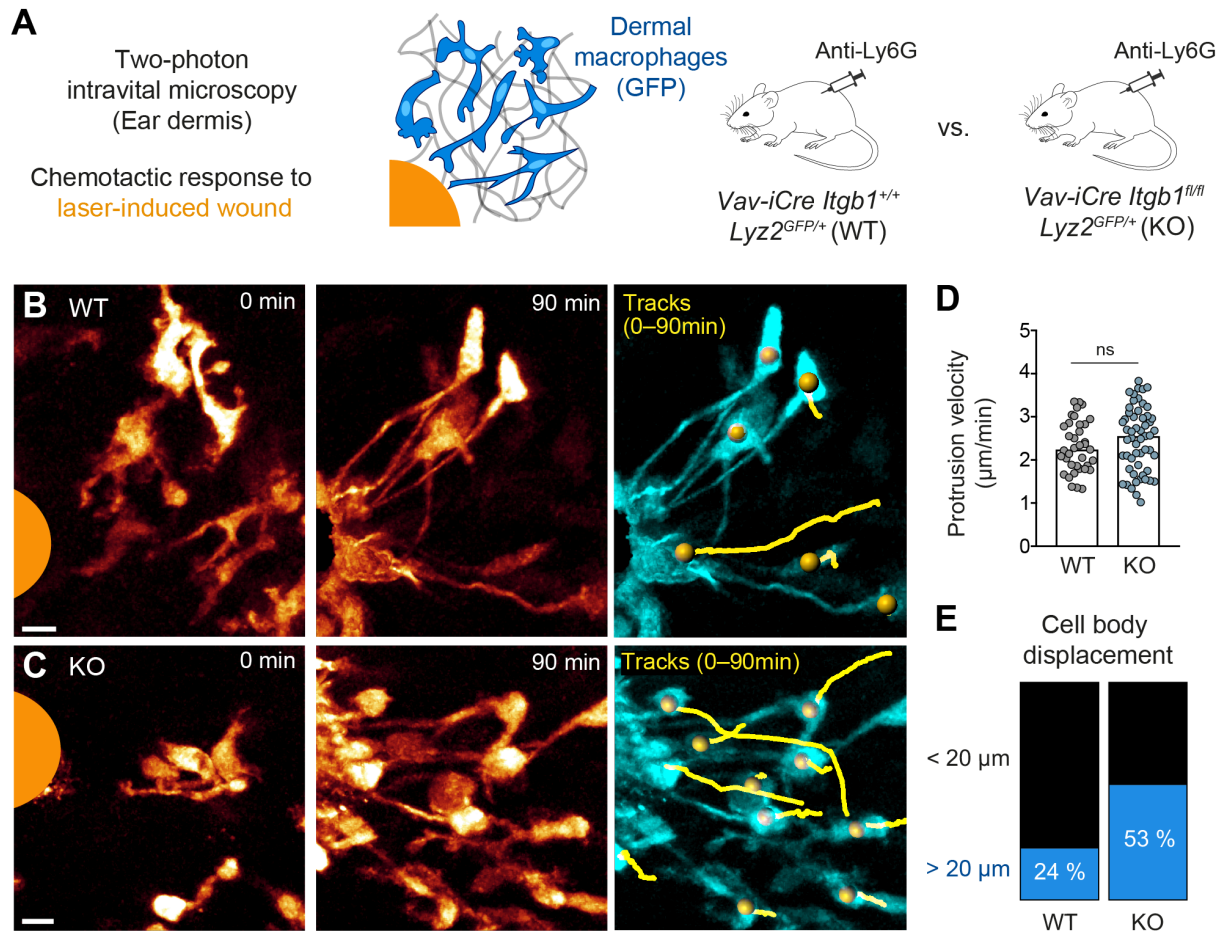

**Figure 4. Amoeboid-like macrophages still perform chemotactic migration in mouse tissue. (A)** Scheme for studying the chemotactic response of dermal macrophages to laser-induced tissue injury in mouse ear skin. Two-photon intravital microscopy (2P-IVM) was performed on *Vav-iCre Itgb1<sup>fl/fl</sup> Lyz2<sup>GFP/+</sup>* and littermate control mice. Mice were treated with Anti-Ly6G antibody to deplete neutrophils and avoid their presence in imaging field of views. **(B, C)** 2P-IVM images of GFP-expressing dermal macrophages in WT mice (B) and conditional *Itgb1*-deficient mice (C) at the onset of the wound response and 90 min later. GFP signal is displayed as glow heatmap color. Cell body displacements are shown as yellow tracks. Scale bars: 10  $\mu\text{m}$ . **(D)** Velocity analysis of macrophage protrusions moving towards the tissue lesion. Each dot represents one protrusion (WT:  $N=37$ ; KO:  $N=55$ ). Values are pooled from  $n=3$  (WT) and  $n=4$  (KO) mice; ns: non-significant, *U* test. Bars are median. **(E)** Cell bodies of responding macrophages were tracked and categorized according to displacement (WT:  $N=34$ ; KO:  $N=55$ ). Values are pooled from  $n=3$  (WT) and  $n=4$  (KO) mice.



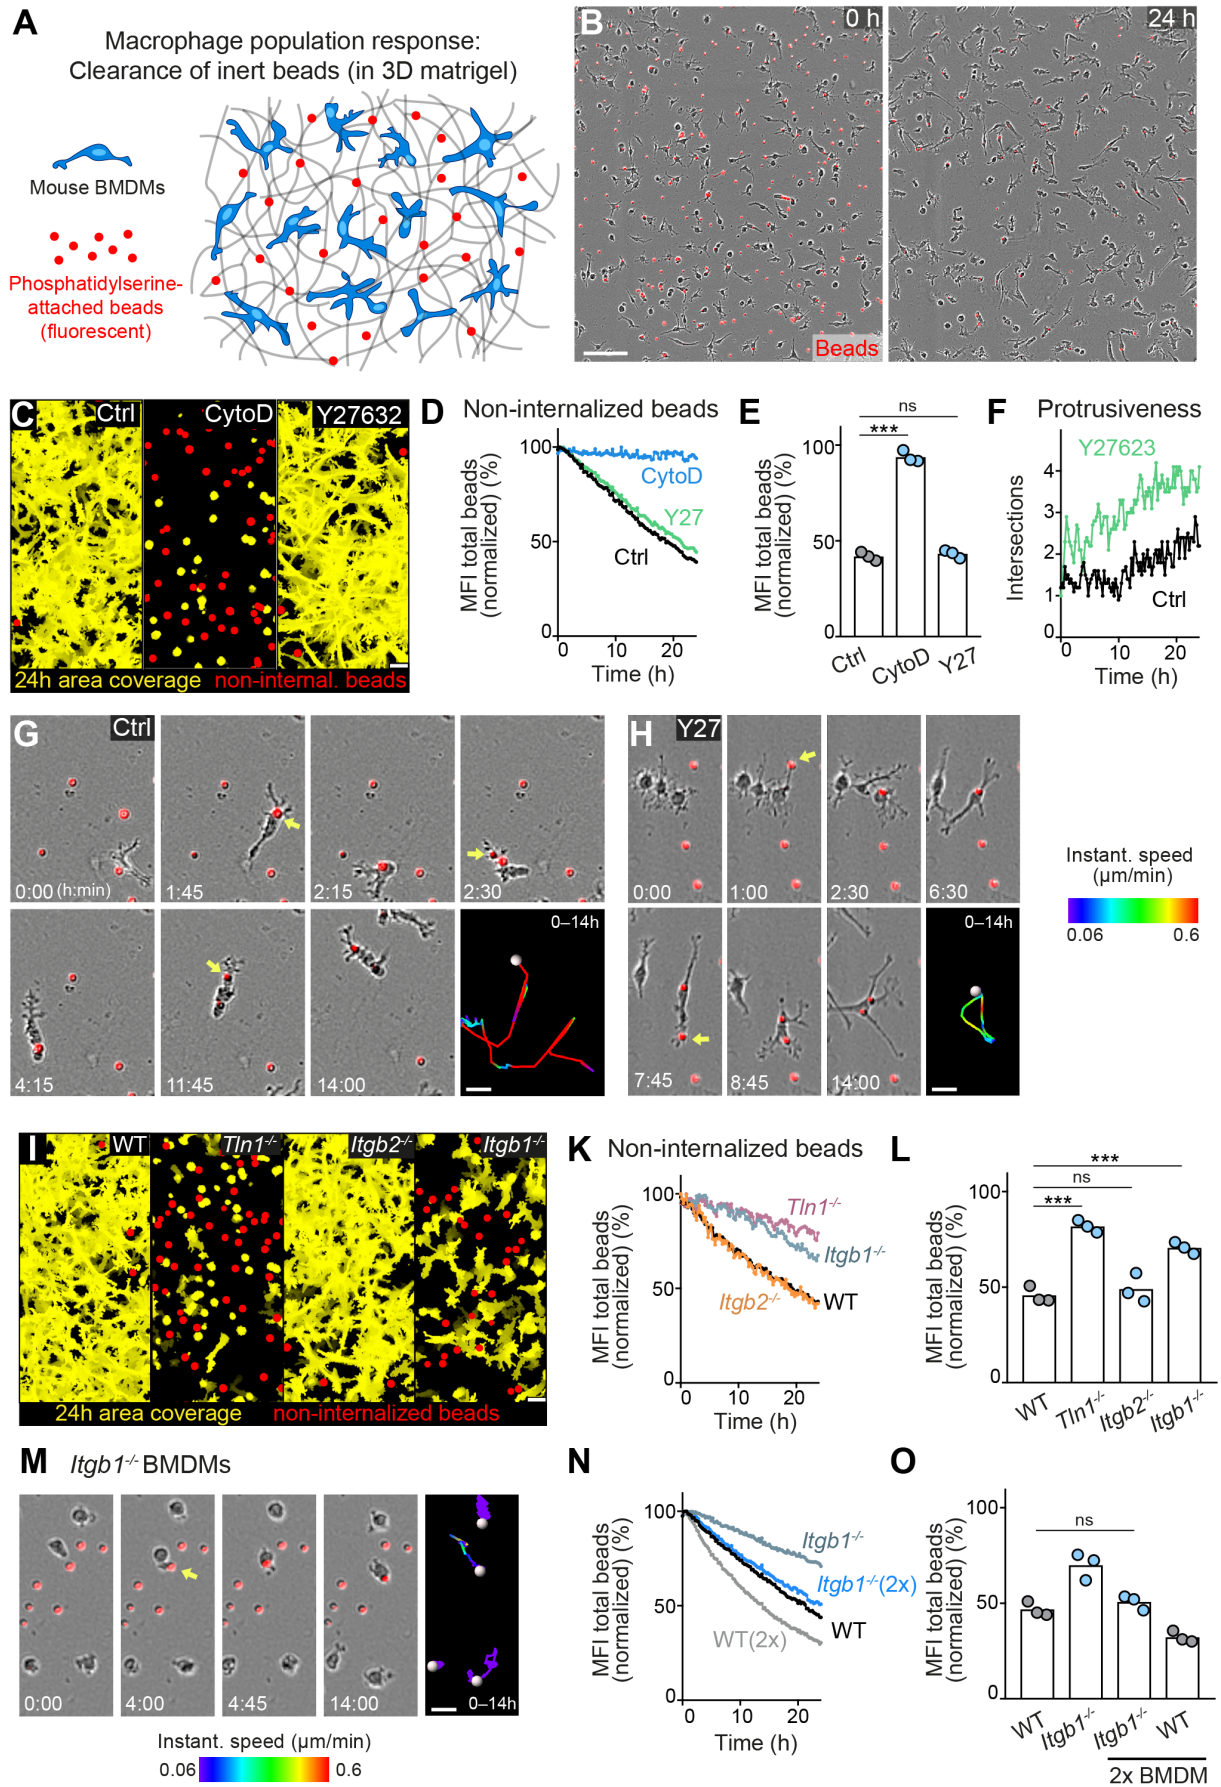

**Figure 5. Haptokinesis is required for optimal bead removal by macrophage networks. (A)** Scheme for studying macrophage network surveillance in 3D *in vitro* matrices. **(B)** Images of start (0 h) and endpoint (24 h) of bead removal by a population of WT BMDMs (unstained). Extracellular, fluorescent beads with surface-attached phosphatidylserine (red, 0 h) were ingested by BMDMs over time. The image shows a quarter of the total imaging field of view. **(C–E)** Analysis of BMDM network sampling activity in the presence of cytochalasin D (CytoD) or Y27632, including (C) time projections of macrophage shapes over 24 h, displayed as total area coverage (yellow) in relation to non-internalized beads (red). Bead sampling by macrophages was measured as mean fluorescence intensity (MFI) decline of bead fluorescence in 15-min intervals over time, presented as (D) time-course analysis from one independent experiment (dots in curves are mean values from  $N=4-5$  technical replicates (separate wells of matrigel), and as (E) 24 h-mean-values calculated from three biological replicates ( $n=3$  per genotype). **(F)** Cell protrusiveness of WT and Y27632-treated BMDMs was determined by Sholl analysis for  $N=10$  randomly chosen cells and presented as mean values at 15-min time intervals over 24 h. **(G, H)** Time sequences of individual control (G) and Y27632-treated (Y27) (H) BMDMs, correlating bead sampling and migratory activity. Yellow arrows highlight bead uptake events. Cell tracks over 14 h are pseudo-colored for instantaneous speed values. **(I–L)** Analysis of BMDM network sampling activity upon genetic interference with integrin functionality was performed as described in (C–E). **(M)** Time sequence of an individual *Itgb1*<sup>-/-</sup> is shown, correlating bead sampling and migratory activity as described in (G, H). **(N, O)** Analysis of *Itgb1*<sup>-/-</sup> BMDM network sampling activity upon doubling (2x) the cell number in the BMDM network. Analysis of network sampling as described in (C–E). All bar graphs display the mean; \*\*\* $P \leq 0.001$ , ns: non-significant; Dunnett's multiple comparison (posthoc ANOVA). Scale bars: 100  $\mu\text{m}$  (B), 40  $\mu\text{m}$  (C, I), 20  $\mu\text{m}$  (G, H, M).



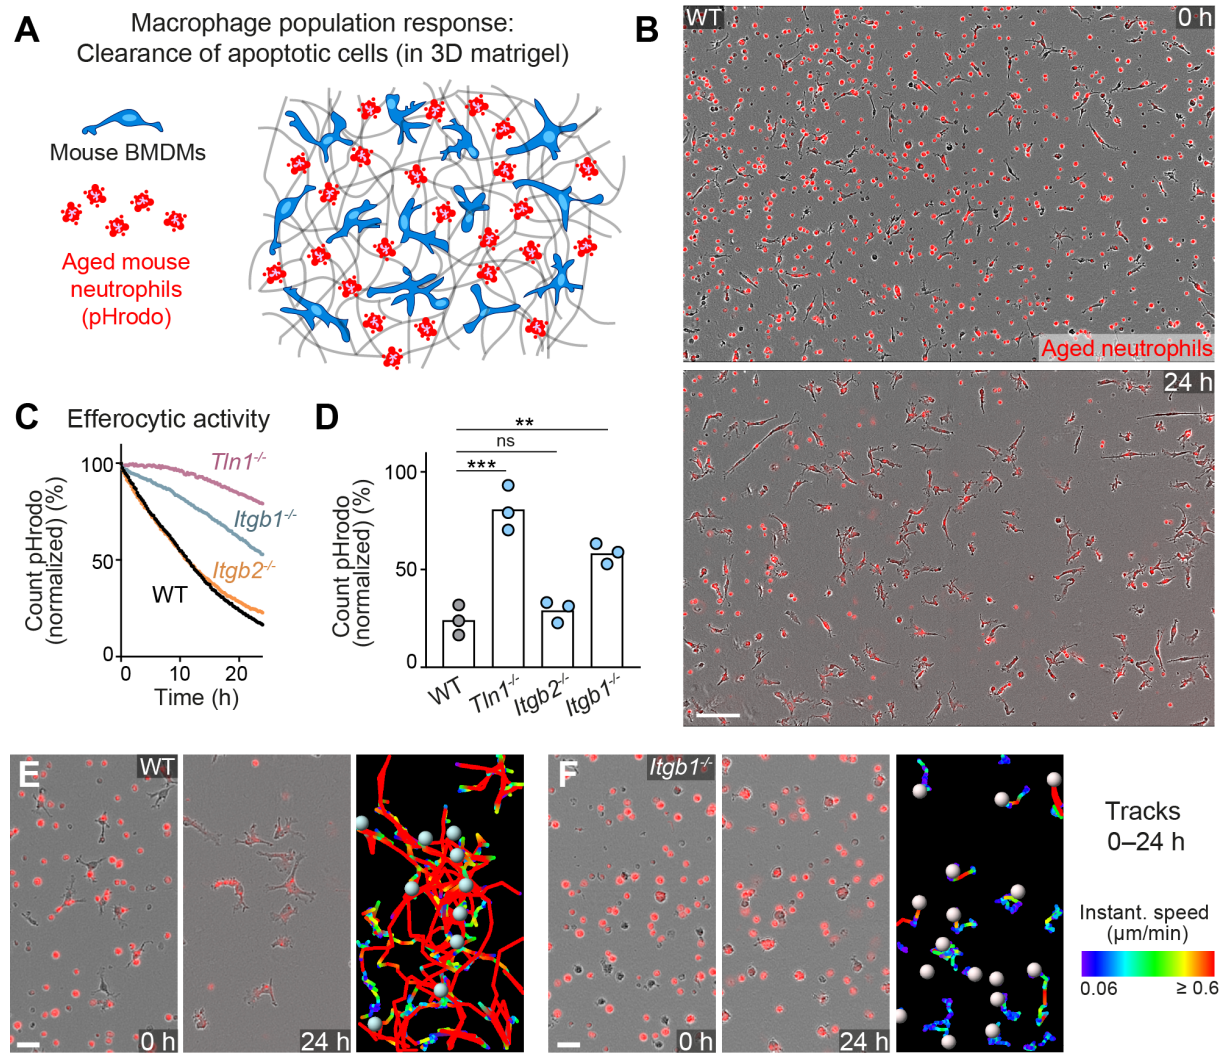

**Figure 6. Haptokinesis is required for optimal efferocytosis by macrophage networks.** (A) Scheme for studying the efferocytic response of macrophage networks in 3D *in vitro* matrices. (B) Live cell imaging snapshots showing the start (0 h) and endpoint (24 h) of dead cell clearance by a population of WT BMDMs (unstained). Extracellular, fluorescently pHrodo-labeled aged neutrophils (red, 0 h) were engulfed and removed by BMDMs over time. The image shows a quarter of the total imaging field of view. Scale bar: 100 μm. (C, D) Analysis of dead neutrophil removal by BMDM networks upon genetic interference with integrin functionality. Neutrophil uptake and digestion by macrophages was measured as an object count decline of pHrodo in 15-min intervals over time, presented as (C) time-course analysis from one independent experiment (dots in curves are mean values from  $N=2-5$  technical replicates (separate wells of matrigel), and as (D) 24h-mean-values calculated from three biological replicates ( $n=3$  per genotype). Bars display the mean; \*\*\* $P \leq 0.001$ , \*\* $P \leq 0.01$ , ns: non-significant; Dunnett's multiple comparison (posthoc ANOVA). (E, F) Correlation of efferocytic and migratory activity in populations of WT (E) and *Itgb1*<sup>-/-</sup> (F) BMDMs. Cell tracks over 24 h are pseudo-colored for instantaneous speed values. Scale bars: 30 μm.

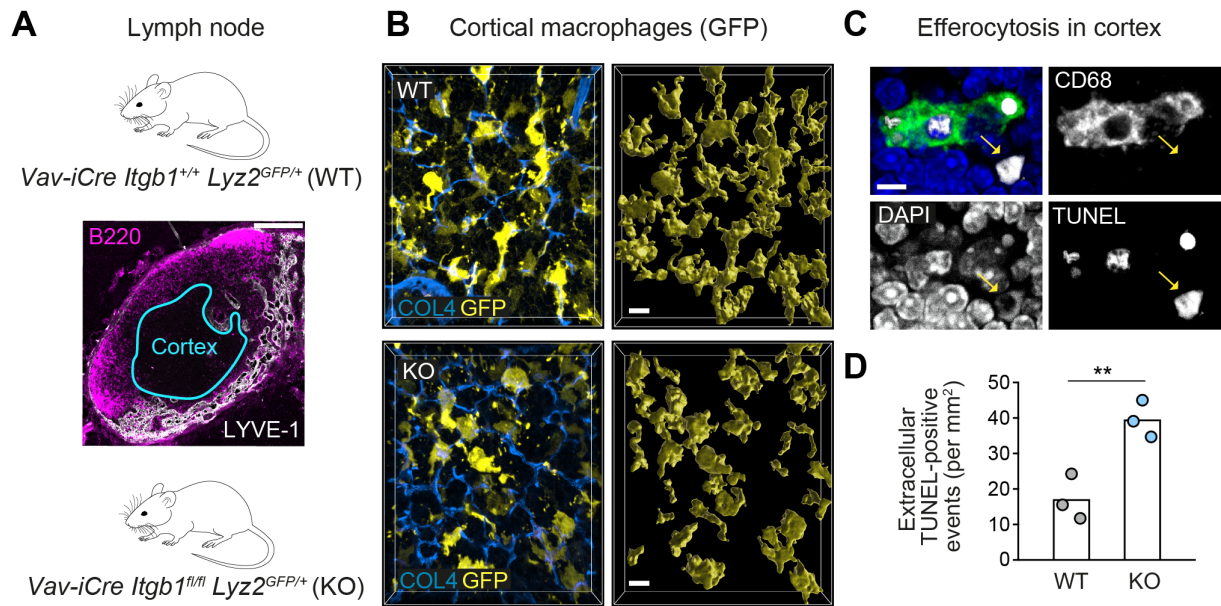

**Figure 7.  $\beta 1$  integrin-dependent surveillance by cortical macrophage networks in lymph nodes. (A)** Immunofluorescence staining of a mouse inguinal lymph node. T cell cortex (cyan outline) was defined as B220- and Lyve-1-negative tissue area. **(B)** Confocal immunofluorescence images of GFP-expressing cortical macrophages in WT and conditional *Itgb1*-deficient mice crossed to *Lyz2<sup>GFP/+</sup>* knock-in mice (left). Collagen IV (COL4) stainings display the cortical reticular fiber network. GFP-based surface representations of macrophage morphologies are shown (right). **(C)** Detection of apoptotic cells by TUNEL method in T cell zones of immunostained lymph node sections. TUNEL-positive cells had altered nuclear DAPI stainings, and were found non-internalized (yellow arrow) or internalized by macrophages (stained by CD68). **(D)** Quantification of non-internalized TUNEL-positive cells in T cell cortices. Dots represent individual mice ( $n=3$  per genotype). Bars display the mean;  $**P\leq 0.01$ ,  $t$  test. Scale bars: 100  $\mu\text{m}$  (A), 10  $\mu\text{m}$  (B), 5  $\mu\text{m}$  (C).
